# Supplementary material for: CXCL12-induced rescue of cortical dendritic spines and cognitive flexibility
Source: eLife. 2020 Jan 23;9:e49717. doi: 10.7554/eLife.49717 (PMC7007222; doi:10.7554/eLife.49717)
Supplement: Figure 1—source data 1. [file elife-49717-fig1-data1.xlsx]

## Sheet: HIV-Tg Behavior
Figure 1
1. Rats are trained to lever press for food reward (45 mg sucrose pellets) in the absence of cue
2. Position Discrimination: Rats must press one of the levers (left or right, no cues present
3. Reversal: Rats are given 20 reminder trials of previous rule, then must press the opposite lever in order to receive reward
3. Set shift to cue: Rats are given 20 position reminder trials, then must shift to press one the lever associated with the cue (tone) in order to receive reward
Criterion for each phase = 10 consecutive correct responses
Position Discrimination
Rat ID	Treatment	Rule (Correct Lever)	Trials to Criterion (TTC)			Rat ID	Treatment	Rule (Correct Lever)	Trials to Criterion (TTC)
1	Control	right	40			7	HIV Tg	right	93
2	Control	left	25			8	HIV Tg	right	87
3	Control	left	32			9	HIV Tg	left	31
4	Control	left	27			10	HIV Tg	left	35
5	Control	right	27			11	HIV Tg	right	33
6	Control	left	30			12	HIV Tg	right	36
			30.1667	AVG					52.5	AVG
			5.4191	ST DEV					29.1599	ST DEV
			2.21234	SEM					11.9045	SEM
Reversal
Rat ID	Treatment	Rule (Correct Lever)	Trials to Criterion (TTC)			Rat ID	Treatment	Rule (Correct Lever)	Trials to Criterion (TTC)
1	Control	left	81			7	HIV Tg	left	79
2	Control	right	79			8	HIV Tg	left	70
3	Control	right	63			9	HIV Tg	right	70
4	Control	right	49			10	HIV Tg	right	58
5	Control	left	167			11	HIV Tg	left	59
6	Control	right	48			12	HIV Tg	left	51
			81.1667	AVG					64.5	AVG
			44.355	ST DEV					10.2518	ST DEV
			18.1079	SEM					4.18529	SEM
Shift to cue
Rat ID	Treatment	Rule (Correct Lever)	Trials to Criterion (TTC)			Rat ID	Treatment	Rule (Correct Lever)	Trials to Criterion (TTC)
1	Control	N/A	177			7	HIV Tg	N/A	1376
2	Control	N/A	77			8	HIV Tg	N/A	1500
3	Control	N/A	313			9	HIV Tg	N/A	744
4	Control	N/A	640			10	HIV Tg	N/A	904
5	Control	N/A	482			11	HIV Tg	N/A	774
6	Control	N/A	416			12	HIV Tg	N/A	1500
			350.833	AVG					1133	AVG
			205.768	ST DEV					363.612	ST DEV
			84.0045	SEM					148.444	SEM

## Sheet: Stats
	Test used	Sample size	P value	Statistical information
Figure 1
A	Mann-Whitney Test	12	0.039	Sum of ranks in column A,B 26 , 52 Mann-Whitney U 5
B	Unpaired t test with equal SD	12	0.3909	CI: -58.08 to 24.74
C	Unpaired t test with equal SD	10	0.001	CI: 402.1 to 1162
D	Linear regression	10	0.0021	F = 15.94. DFn = 1, DFd = 11
