# Supplementary material for: CXCL12-induced rescue of cortical dendritic spines and cognitive flexibility
Source: eLife. 2020 Jan 23;9:e49717. doi: 10.7554/eLife.49717 (PMC7007222; doi:10.7554/eLife.49717)
Supplement: Figure 2—source data 1. [file elife-49717-fig2-data1.xlsx]

## Sheet: Overall Spine Density
	WT				HIV-Tg
Animal #	Dendrite #	Density(1/µm)		Animal #	Dendrite #	Density(1/µm)
1	1	0.82		1	1	0.48
1	2	0.71		1	2	0.61
1	3	0.48		1	3	0.5
1	4	0.49		1	4	0.68
1	5	0.56		1	5	0.55
1	6	0.89		1	6	0.55
1	7	0.65		1	7	0.68
1	8	0.71		1	8	0.71
		0.66375	Average			0.595
2	1	0.52		2	1	0.64
2	2	0.58		2	2	0.67
2	3	0.65		2	3	0.6
2	4	0.58		2	4	0.44
2	5	0.6		2	5	0.49
2	6	0.52		2	6	0.75
2	7	0.55		2	7	0.53
2	8	0.56		2	8	0.59
		0.57	Average			0.58875
3	1	0.54		3	1	0.43
3	2	0.62		3	2	0.55
3	3	0.48		3	3	0.54
3	4	0.54		3	4	0.63
3	5	0.56		3	5	0.54
3	6	0.56		3	6	0.46
3	7	0.57		3	7	0.6
3	8	0.65		3	8	0.56
		0.565	Average			0.53875
4	1	0.6		4	1	0.69
4	2	0.41		4	2	1.12
4	3	0.67		4	3	0.68
4	4	0.74		4	4	0.99
4	5	0.45		4	5	0.57
4	6	0.33		4	6	0.71
4	7	0.45		4	7	0.74
4	8	0.44		4	8	0.75
		0.51125	Average			0.78125
5	1	0.55		5	1	0.8
5	2	0.7		5	2	0.74
5	3	0.72		5	3	0.55
5	4	0.6		5	4	0.41
5	5	0.7		5	5	0.61
5	6	0.45		5	6	0.78
5	7	0.65		5	7	0.7
5	8	0.74		5	8	0.45
		0.63875	Average			0.63
6	1	0.7		6	1	0.61
6	2	0.73		6	2	0.54
6	3	0.86		6	3	0.66
6	4	0.62		6	4	0.64
6	5	0.55		6	5	0.56
6	6	0.44		6	6	0.52
6	7	0.43		6	7	0.44
6	8	0.32		6	8	0.76
		0.58125	Average			0.59125

## Sheet: Thin Spine Density
	WT				HIV-Tg
Animal #	Dendrite #	Density(1/µm)		Animal #	Dendrite #	Density(1/µm)
1	1	0.32		1	1	0.11
1	2	0.25		1	2	0.09
1	3	0.28		1	3	0.15
1	4	0.17		1	4	0.22
1	5	0.3		1	5	0.19
1	6	0.32		1	6	0.14
1	7	0.19		1	7	0.14
1	8	0.38		1	8	0.11
		0.27625				0.14375
2	1	0.18		2	1	0.11
2	2	0.17		2	2	0.09
2	3	0.11		2	3	0.08
2	4	0.31		2	4	0.11
2	5	0.15		2	5	0.13
2	6	0.34		2	6	0.04
2	7	0.18		2	7	0.14
2	8	0.1		2	8	0.09
		0.1925				0.09875
3	1	0.44		3	1	0.11
3	2	0.17		3	2	0.09
3	3	0.29		3	3	0.1
3	4	0.31		3	4	0.05
3	5	0.45		3	5	0.19
3	6	0.41		3	6	0.14
3	7	0.18		3	7	0.18
3	8	0.2		3	8	0.11
		0.30625				0.12125
4	1	0.18		4	1	0.1
4	2	0.17		4	2	0.07
4	3	0.29		4	3	0.05
4	4	0.11		4	4	0.08
4	5	0.26		4	5	0.09
4	6	0.12		4	6	0.08
4	7	0.18		4	7	0.09
4	8	0.28		4	8	0.1
		0.19875				0.0825
5	1	0.17		5	1	0.16
5	2	0.29		5	2	0.13
5	3	0.18		5	3	0.07
5	4	0.31		5	4	0.13
5	5	0.22		5	5	0.11
5	6	0.38		5	6	0.12
5	7	0.18		5	7	0.21
5	8	0.45		5	8	0.31
		0.287143				0.155
6	1	0.15		6	1	0.16
6	2	0.1		6	2	0.13
6	3	0.22		6	3	0.07
6	4	0.31		6	4	0.21
6	5	0.25		6	5	0.11
6	6	0.41		6	6	0.28
6	7	0.44		6	7	0.21
6	8	0.18		6	8	0.31
		0.2575				0.185

## Sheet: Mushroom Spine Density
	WT				HIV-Tg
Animal #	Dendrite #	Density(1/µm)		Animal #	Dendrite #	Density(1/µm)
1	1	0.26		1	1	0.11
1	2	0.25		1	2	0.09
1	3	0.28		1	3	0.15
1	4	0.17		1	4	0.18
1	5	0.25		1	5	0.19
1	6	0.11		1	6	0.2
1	7	0.19		1	7	0.14
1	8	0.28		1	8	0.11
		0.22375				0.14625
2	1	0.18		2	1	0.11
2	2	0.17		2	2	0.09
2	3	0.23		2	3	0.08
2	4	0.31		2	4	0.11
2	5	0.45		2	5	0.05
2	6	0.34		2	6	0.04
2	7	0.18		2	7	0.03
2	8	0.37		2	8	0.09
		0.27875				0.075
3	1	0.41		3	1	0.14
3	2	0.34		3	2	0.15
3	3	0.29		3	3	0.17
3	4	0.15		3	4	0.15
3	5	0.15		3	5	0.19
3	6	0.15		3	6	0.14
3	7	0.18		3	7	0.35
3	8	0.2		3	8	0.12
		0.23375				0.17625
4	1	0.56		4	1	0.1
4	2	0.17		4	2	0.24
4	3	0.29		4	3	0.14
4	4	0.31		4	4	0.08
4	5	0.26		4	5	0.09
4	6	0.12		4	6	0.18
4	7	0.35		4	7	0.13
4	8	0.14		4	8	0.1
		0.275				0.1325
5	1	0.17		5	1	0.16
5	2	0.29		5	2	0.06
5	3	0.18		5	3	0.07
5	4	0.31		5	4	0.04
5	5	0.22		5	5	0.08
5	6	0.17		5	6	0.12
5	7	0.18		5	7	0.11
5	8	0.45		5	8	0.06
		0.257143				0.0875
6	1	0.15		6	1	0.06
6	2	0.1		6	2	0.03
6	3	0.22		6	3	0.07
6	4	0.31		6	4	0.21
6	5	0.18		6	5	0.11
6	6	0.41		6	6	0.08
6	7	0.4		6	7	0.14
6	8	0.18		6	8	0.21
		0.24375				0.11375

## Sheet: Stubby Spine Density
	WT				HIV-Tg
Animal #	Dendrite #	Density(1/µm)		Animal #	Dendrite #	Density(1/µm)
1	1	0.12		1	1	0.11
1	2	0.15		1	2	0.15
1	3	0.08		1	3	0.15
1	4	0.07		1	4	0.25
1	5	0.3		1	5	0.34
1	6	0.12		1	6	0.14
1	7	0.09		1	7	0.2
1	8	0.18		1	8	0.11
		0.13875				0.18125
2	1	0.18		2	1	0.11
2	2	0.07		2	2	0.39
2	3	0.11		2	3	0.08
2	4	0.21		2	4	0.45
2	5	0.05		2	5	0.13
2	6	0.24		2	6	0.55
2	7	0.18		2	7	0.14
2	8	0.1		2	8	0.09
		0.1425				0.2425
3	1	0.03		3	1	0.11
3	2	0.02		3	2	0.17
3	3	0.04		3	3	0.1
3	4	0.01		3	4	0.11
3	5	0.04		3	5	0.19
3	6	0.02		3	6	0.14
3	7	0.03		3	7	0.18
3	8	0.04		3	8	0.11
		0.02875				0.13875
4	1	0.03		4	1	0.1
4	2	0.06		4	2	0.65
4	3	0.04		4	3	0.05
4	4	0.01		4	4	0.08
4	5	0.04		4	5	0.49
4	6	0.02		4	6	0.44
4	7	0.03		4	7	0.09
4	8	0.04		4	8	0.1
		0.03375				0.25
5	1	0.17		5	1	0.1
5	2	0.06		5	2	0.07
5	3	0.18		5	3	0.05
5	4	0.04		5	4	0.08
5	5	0.02		5	5	0.09
5	6	0.03		5	6	0.08
5	7	0.18		5	7	0.09
5	8	0.01		5	8	0.1
		0.08625				0.0825
6	1	0.17		6	1	0.07
6	2	0.06		6	2	0.13
6	3	0.23		6	3	0.07
6	4	0.04		6	4	0.11
6	5	0.02		6	5	0.11
6	6	0.03		6	6	0.13
6	7	0.03		6	7	0.21
6	8	0.01		6	8	0.21
		0.07375				0.13

## Sheet: Stats
	Test used	Sample size	P value	Statistical information
Figure 2
A	Unpaired t test with equal SD	12	0.0002	CI: -1.891 to -0.8398
B	Unpaired t test with equal SD	12	0.0006	CI: -1.842 to -0.6879
C	Unpaired t test with equal SD	12	<0.0001	CI: -1.744 to -0.8758
D	Unpaired t test with equal SD	12	0.0212	CI: 0.1545 to 1.529
E	Pearson's correlation	10	0.0151	CI: -0.9334 to -0.2000; r= -0.7368
F	Pearson's correlation	10	0.0063	CI: -0.9486 to -0.3239; r= -0.7920
Figure 2 supplement 1	Pearson's correlation (position discrimination)	12	0.1374	r=-0.4548; -0.8158 to 0.1612
	Pearson's correlation (reversal)	12	0.109	r= 0.4862; -0.1216 to 0.8289
