# Supplementary material for: CXCL12-induced rescue of cortical dendritic spines and cognitive flexibility
Source: eLife. 2020 Jan 23;9:e49717. doi: 10.7554/eLife.49717 (PMC7007222; doi:10.7554/eLife.49717)
Supplement: Figure 3—source data 1. [file elife-49717-fig3-data1.xlsx]

## Sheet: WT and HIV-Tg Behavior
Figure 3 (HIV-TG ± CXCL12 shift to cue and spine morphology)
Figure 3 - figure supplement 2 (HIV-Tg position discrimination and reversal)
Figure 3 - figure supplement 3 (WT ± CXCL12 behavior)
Figure 3 - figure supplement 4 (WT ± CXCL12 spine morphology)
1. Rats are trained to lever press for food reward (45 mg sucrose pellets) in the absence of cue
2. Position Discrimination: Rats must press one of the levers (left or right, no cues present)
3. Reversal: Rats are given 20 reminder trials of previous rule, then must press the opposite lever in order to receive reward
3. Set shift to cue: Rats are given 20 position reminder trials, then must shift to press the lever associated with the cue (tone) in order to receive reward
Criterion for each phase = 10 consecutive correct responses
Position Discrimination
Rat ID	Genotype	Treatment	Rule (Correct Lever)	Trials to Criterion (TTC)			Rat ID	Genotype	Treatment	Rule (Correct Lever)	Trials to Criterion (TTC)
8	WT	vehicle	Left	85			2	HIV Tg	vehicle	Right	62
9	WT	vehicle	Right	38			3	HIV Tg	vehicle	Right	88
10	WT	vehicle	Left	49			4	HIV Tg	vehicle	Left	28
10	WT	vehicle	Right	88			1	HIV Tg	vehicle	Left	42
11	WT	vehicle	Right	31			5	HIV Tg	vehicle	Right	42
13	WT	vehicle	Left	37			6	HIV Tg	vehicle	Right	128
14	WT	vehicle	Left	60			7	HIV Tg	vehicle	Left	53
7	WT	vehicle	Right	49			1	HIV Tg	vehicle	Left	16
9	WT	vehicle	Right	39			4	HIV Tg	vehicle	Right	46
11	WT	vehicle	Left	56			6	HIV Tg	vehicle	Right	20
				53.2	AVG						52.5	AVG
				19.7191	ST DEV						33.8337	ST DEV
				6.23574	SEM						10.6992	SEM
Rat ID	Genotype	Treatment	Rule (Correct Lever)	Trials to Criterion (TTC)			Rat ID	Genotype	Treatment	Rule (Correct Lever)	Trials to Criterion (TTC)
7	WT	CXCL12	Left	45			1	HIV Tg	CXCL12	Right	105
11	WT	CXCL12	Left	67			5	HIV Tg	CXCL12	Right	108
12	WT	CXCL12	Right	43			6	HIV Tg	CXCL12	Left	11
9	WT	CXCL12	Left	53			2	HIV Tg	CXCL12	Right	118
12	WT	CXCL12	Left	42			3	HIV Tg	CXCL12	Right	71
15	WT	CXCL12	Right	45			4	HIV Tg	CXCL12	Left	76
16	WT	CXCL12	Left	29			8	HIV Tg	CXCL12	Right	21
8	WT	CXCL12	Right	76			2	HIV Tg	CXCL12	Left	24
10	WT	CXCL12	Left	38			3	HIV Tg	CXCL12	Left	25
12	WT	CXCL12	Left	40			5	HIV Tg	CXCL12	Right	57
				47.8	AVG						61.6	AVG
				14.038	ST DEV						40.1337	ST DEV
				4.43922	SEM						12.6914	SEM
Reversal
Rat ID	Genotype	Treatment	Rule (Correct Lever)	Trials to Criterion (TTC)			Rat ID	Genotype	Treatment	Rule (Correct Lever)	Trials to Criterion (TTC)
8	WT	vehicle	Right	64			2	HIV Tg	vehicle	Left	85
9	WT	vehicle	Left	58			3	HIV Tg	vehicle	Left	103
10	WT	vehicle	Right	102			4	HIV Tg	vehicle	Right	47
10	WT	vehicle	Left	57			1	HIV Tg	vehicle	Right	66
11	WT	vehicle	Left	82			5	HIV Tg	vehicle	Left	100
13	WT	vehicle	Right	102			6	HIV Tg	vehicle	Left	185
14	WT	vehicle	Right	112			7	HIV Tg	vehicle	Right	53
7	WT	vehicle	Left	97			1	HIV Tg	vehicle	Right	112
9	WT	vehicle	Left	83			4	HIV Tg	vehicle	Left	53
11	WT	vehicle	Right	93			6	HIV Tg	vehicle	Left	106
				85	AVG						91	AVG
				19.6695	ST DEV						41.1123	ST DEV
				6.22004	SEM						13.0009	SEM
Rat ID	Genotype	Treatment	Rule (Correct Lever)	Trials to Criterion (TTC)			Rat ID	Genotype	Treatment	Rule (Correct Lever)	Trials to Criterion (TTC)
7	WT	CXCL12	Right	96			1	HIV Tg	CXCL12	Left	98
11	WT	CXCL12	Right	59			5	HIV Tg	CXCL12	Left	107
12	WT	CXCL12	Left	87			6	HIV Tg	CXCL12	Right	77
9	WT	CXCL12	Right	102			2	HIV Tg	CXCL12	Left	45
12	WT	CXCL12	Right	70			3	HIV Tg	CXCL12	Left	83
15	WT	CXCL12	Left	48			4	HIV Tg	CXCL12	Right	100
16	WT	CXCL12	Right	51			8	HIV Tg	CXCL12	Left	163
8	WT	CXCL12	Left	215			2	HIV Tg	CXCL12	Right	92
10	WT	CXCL12	Right	145			3	HIV Tg	CXCL12	Right	133
12	WT	CXCL12	Right	61			5	HIV Tg	CXCL12	Left	60
				93.4	AVG						95.8	AVG
				51.8656	ST DEV						34.0614	ST DEV
				16.4014	SEM						10.7712	SEM
Shift to cue
Rat ID	Genotype	Treatment	Rule (Correct Lever)	Trials to Criterion (TTC)			Rat ID	Genotype	Treatment	Rule (Correct Lever)	Trials to Criterion (TTC)
8	WT	vehicle	N/A	1296			2	HIV Tg	vehicle	N/A	1500
9	WT	vehicle	N/A	1500			3	HIV Tg	vehicle	N/A	1500
10	WT	vehicle	N/A	728			4	HIV Tg	vehicle	N/A	976
10	WT	vehicle	N/A	1500			1	HIV Tg	vehicle	N/A	1500
11	WT	vehicle	N/A	803			5	HIV Tg	vehicle	N/A	1500
13	WT	vehicle	N/A	1500			6	HIV Tg	vehicle	N/A	1500
14	WT	vehicle	N/A	1500			7	HIV Tg	vehicle	N/A	1500
7	WT	vehicle	N/A	822			1	HIV Tg	vehicle	N/A	1500
9	WT	vehicle	N/A	1123			4	HIV Tg	vehicle	N/A	1500
11	WT	vehicle	N/A				6	HIV Tg	vehicle	N/A	1315
				1196.89	AVG						1429.1	AVG
				335.1	ST DEV						169.487	ST DEV
				111.7	SEM						53.5965	SEM
Rat ID	Genotype	Treatment	Rule (Correct Lever)	Trials to Criterion (TTC)			Rat ID	Genotype	Treatment	Rule (Correct Lever)	Trials to Criterion (TTC)
7	WT	CXCL12	N/A	664			1	HIV Tg	CXCL12	N/A	369
11	WT	CXCL12	N/A	878			5	HIV Tg	CXCL12	N/A	510
12	WT	CXCL12	N/A	566			6	HIV Tg	CXCL12	N/A	1500
9	WT	CXCL12	N/A	823			2	HIV Tg	CXCL12	N/A	1500
12	WT	CXCL12	N/A	1500			3	HIV Tg	CXCL12	N/A	930
15	WT	CXCL12	N/A	1398			4	HIV Tg	CXCL12	N/A	1500
16	WT	CXCL12	N/A	986			8	HIV Tg	CXCL12	N/A	961
8	WT	CXCL12	N/A	730			2	HIV Tg	CXCL12	N/A	1078
10	WT	CXCL12	N/A	1500			3	HIV Tg	CXCL12	N/A	554
12	WT	CXCL12	N/A	1500			5	HIV Tg	CXCL12	N/A	607
				1054.5	AVG						950.9	AVG
				379.951	ST DEV						438.434	ST DEV
				120.151	SEM						138.645	SEM

## Sheet: Overall Spine Density
	Tg+Vehicle				Tg+CXCL12				WT+Vehicle				WT+CXCL12
Animal #	Dendrite #	Density(1/µm)		Animal #	Dendrite #	Density(1/µm)		Animal #	Dendrite #	Density(1/µm)		Animal #	Dendrite #	Density(1/µm)
1	1	0.68		1	1	0.78		1	1	0.68		1	1	0.55
1	2	0.19		1	2	0.81		1	2	0.78		1	2	0.75
1	3	0.31		1	3	0.89		1	3	0.56		1	3	0.66
1	4	0.49		1	4	0.8		1	4	0.49		1	4	1
1	5	0.22		1	5	0.67		1	5	0.32		1	5	0.67
1	6	0.23		1	6	0.77		1	6	0.54		1	6	0.72
1	7	0.42		1	7	0.72		1	7	0.77		1	7	0.53
1	8	0.71		1	8	0.71		1	8	0.65		1	8	0.91
		0.40625	Average			0.76875				0.59875				0.72375
2	1	0.42		2	1	0.67		2	1	0.56		2	1	0.43
2	2	0.71		2	2	0.67		2	2	0.61		2	2	0.67
2	3	0.48		2	3	0.6		2	3	0.55		2	3	0.89
2	4	0.49		2	4	0.9		2	4	0.54		2	4	0.6
2	5	0.56		2	5	0.88		2	5	0.66		2	5	0.88
2	6	0.23		2	6	0.75		2	6	0.43		2	6	0.8
2	7	0.22		2	7	0.53		2	7	0.64		2	7	0.67
2	8	0.71		2	8	0.85		2	8	0.32		2	8	0.99
		0.4775	Average			0.73125				0.53875				0.74125
3	1	0.78		3	1	0.65		3	1	0.98		3	1	0.99
3	2	0.62		3	2	0.55		3	2	0.77		3	2	0.91
3	3	0.48		3	3	0.54		3	3	0.48		3	3	0.83
3	4	0.87		3	4	0.63		3	4	0.78		3	4	0.88
3	5	0.56		3	5	0.65		3	5	0.65		3	5	1.13
3	6	0.56		3	6	0.87		3	6	0.68		3	6	0.95
3	7	0.57		3	7	0.6		3	7	0.43		3	7	0.79
3	8	0.65		3	8	0.56		3	8	0.87		3	8	0.77
		0.63625	Average			0.63125				0.705				0.90625
4	1	0.6		4	1	0.69		4	1	0.77		4	1	0.87
4	2	0.41		4	2	0.99		4	2	0.68		4	2	0.79
4	3	0.67		4	3	0.68		4	3	0.77		4	3	0.99
4	4	0.74		4	4	0.89		4	4	0.93		4	4	0.77
4	5	0.45		4	5	0.57		4	5	0.55		4	5	0.88
4	6	0.33		4	6	0.71		4	6	0.52		4	6	0.89
4	7	0.45		4	7	0.74		4	7	0.66		4	7	0.9
4	8	0.44		4	8	0.75		4	8	0.46		4	8	0.79
		0.51125	Average			0.7525				0.6675				0.86
5	1	0.55		5	1	0.8		5	1	0.63		5	1	0.75
5	2	0.59		5	2	0.74		5	2	0.76		5	2	0.94
5	3	0.45		5	3	0.55		5	3	0.55		5	3	0.77
5	4	0.6		5	4	0.88		5	4	0.69		5	4	0.74
5	5	0.7		5	5	0.61		5	5	0.74		5	5	0.89
5	6	0.45		5	6	0.78		5	6	0.55		5	6	0.97
5	7	0.55		5	7	0.7		5	7	0.79		5	7	0.86
5	8	0.32		5	8	0.45		5	8	0.31		5	8	0.68
		0.52625	Average			0.68875				0.6275				0.825
6	1	0.7		6	1	0.61		6	1	0.88		6	1	0.81
6	2	0.73		6	2	0.99		6	2	0.76		6	2	0.77
6	3	0.56		6	3	0.66		6	3	0.79		6	3	0.89
6	4	0.62		6	4	0.64		6	4	0.69		6	4	0.75
6	5	0.55		6	5	0.56		6	5	0.84		6	5	0.86
6	6	0.44		6	6	0.45		6	6	0.68		6	6	0.68
6	7	0.43		6	7	0.7		6	7	0.98		6	7	0.99
6	8	0.32		6	8	0.76		6	8	0.25		6	8	0.89
		0.54375	Average			0.67125				0.73375				0.83
7	1	0.7		7	1	0.61		7	1	0.7		7	1	0.61
7	2	0.73		7	2	0.99		7	2	0.73		7	2	0.89
7	3	0.56		7	3	0.66		7	3	0.56		7	3	0.86
7	4	0.45		7	4	0.64		7	4	0.66		7	4	0.88
7	5	0.55		7	5	0.68		7	5	0.55		7	5	0.7
7	6	0.44		7	6	0.67		7	6	0.67		7	6	0.93
7	7	0.43		7	7	0.7		7	7	0.86		7	7	0.88
7	8	0.32		7	8	0.76		7	8	0.96		7	8	0.85
		0.5225				0.71375				0.71125				0.825
8	1	0.13		8	1	0.61		8	1	0.86		8	1	0.86
8	2	0.73		8	2	0.56		8	2	0.55		8	2	0.78
8	3	0.5		8	3	0.66		8	3	0.87		8	3	0.88
8	4	0.31		8	4	0.64		8	4	0.54		8	4	0.79
8	5	0.55		8	5	0.44		8	5	0.68		8	5	0.75
8	6	0.54		8	6	0.45		8	6	0.56		8	6	0.98
8	7	0.65		8	7	0.7		8	7	0.99		8	7	0.7
8	8	0.32		8	8	0.76		8	8	0.77		8	8	0.76
		0.46625				0.6025				0.7275				0.8125
9	1	0.32		9	1	0.61		9	1	0.52		9	1	0.61
9	2	0.44		9	2	0.55		9	2	0.58		9	2	0.87
9	3	0.56		9	3	0.66		9	3	0.97		9	3	0.77
9	4	0.34		9	4	0.64		9	4	0.44		9	4	0.86
9	5	0.55		9	5	0.56		9	5	0.78		9	5	0.64
9	6	0.44		9	6	0.67		9	6	0.57		9	6	0.88
9	7	0.54		9	7	0.67		9	7	0.66		9	7	0.85
9	8	0.42		9	8	0.72		9	8	0.75		9	8	0.54
		0.45125				0.635				0.65875				0.7525
				10	1	0.61						10	1	0.66
				10	2	0.64						10	2	0.77
				10	3	0.66						10	3	0.52
				10	4	0.99						10	4	0.53
				10	5	0.56						10	5	0.789
				10	6	0.45						10	6	0.84
				10	7	0.7						10	7	0.58
				10	8	0.76						10	8	0.89
						0.67125								0.697375

## Sheet: Thin Spine Density
	Tg+Vehicle				Tg+CXCL12				WT+Vehicle				WT+CXCL12
Animal #	Dendrite #	Density(1/µm)		Animal #	Dendrite #	Density(1/µm)		0.13	Dendrite #	Density(1/µm)		Animal #	Dendrite #	Density(1/µm)
1	1	0.07		1	1	0.32		0.13	1	0.32		1	1	0.44
1	2	0.07		1	2	0.13		9	2	0.25		1	2	0.32
1	3	0.05		1	3	0.29		1	3	0.28		1	3	0.11
1	4	0.05		1	4	0.5		1	4	0.17		1	4	0.5
1	5	0.03		1	5	0.37		1	5	0.25		1	5	0.33
1	6	0.1		1	6	0.67		1	6	0.45		1	6	0.44
1	7	0.14		1	7	0.62		1	7	0.19		1	7	0.35
1	8	0.13		1	8	0.71		1	8	0.38		1	8	0.87
		0.08				0.45125				0.28625				0.42	Average
2	1	0.1		2	1	0.32		2	1	0.22		2	1	0.21
2	2	0.19		2	2	0.37		2	2	0.34		2	2	0.56
2	3	0.05		2	3	0.6		2	3	0.43		2	3	0.69
2	4	0.1		2	4	0.9		2	4	0.33		2	4	0.3
2	5	0.13		2	5	0.35		2	5	0.32		2	5	0.44
2	6	0.09		2	6	0.43		2	6	0.22		2	6	0.23
2	7	0.07		2	7	0.23		2	7	0.15		2	7	0.45
2	8	0.07		2	8	0.9		2	8	0.22		2	8	0.1
		0.1	Average			0.5125				0.27875				0.3725
3	1	0.11		3	1	0.34		3	1	0.33		3	1	0.38
3	2	0.12		3	2	0.41		3	2	0.26		3	2	0.22
3	3	0.26		3	3	0.23		3	3	0.33		3	3	0.18
3	4	0.09		3	4	0.32		3	4	0.11		3	4	0.19
3	5	0.15		3	5	0.13		3	5	0.24		3	5	0.44
3	6	0.11		3	6	0.22		3	6	0.32		3	6	0.88
3	7	0.25		3	7	0.14		3	7	0.23		3	7	0.89
3	8	0.05		3	8	0.16		3	8	0.72		3	8	0.85
		0.1425	Average			0.24375				0.3175				0.50375
4	1	0.05		4	1	0.29		4	1	0.23		4	1	0.44
4	2	0.07		4	2	0.19		4	2	0.26		4	2	0.32
4	3	0.1		4	3	0.12		4	3	0.26		4	3	0.21
4	4	0.11		4	4	0.45		4	4	0.11		4	4	0.32
4	5	0.1		4	5	0.38		4	5	0.16		4	5	0.28
4	6	0.09		4	6	0.51		4	6	0.25		4	6	0.56
4	7	0.06		4	7	0.54		4	7	0.44		4	7	0.13
4	8	0.06		4	8	0.45		4	8	0.45		4	8	0.97
		0.08	Average			0.36625				0.27				0.40375
5	1	0.12		5	1	0.4		5	1	0.44		5	1	0.12
5	2	0.14		5	2	0.3		5	2	0.32		5	2	0.15
5	3	0.11		5	3	0.28		5	3	0.43		5	3	0.33
5	4	0.13		5	4	0.12		5	4	0.22		5	4	0.26
5	5	0.1		5	5	0.29		5	5	0.19		5	5	0.2
5	6	0.16		5	6	0.98		5	6	0.2		5	6	0.24
5	7	0.13		5	7	0.4		5	7	0.31		5	7	0.24
5	8	0.07		5	8	0.57		5	8	0.31		5	8	0.31
		0.12	Average			0.4175				0.3025				0.23125
6	1	0.24		6	1	0.4		6	1	0.44		6	1	0.33
6	2	0.22		6	2	0.2		6	2	0.32		6	2	0.22
6	3	0.23		6	3	0.33		6	3	0.15		6	3	0.2
6	4	0.26		6	4	0.09		6	4	0.2		6	4	0.43
6	5	0.35		6	5	0.32		6	5	0.21		6	5	0.31
6	6	0.21		6	6	0.78		6	6	0.23		6	6	0.32
6	7	0.23		6	7	0.7		6	7	0.56		6	7	0.66
6	8	0.1		6	8	0.45		6	8	0.77		6	8	0.9
		0.23	Average			0.40875				0.36				0.42125
7	1	0.21		7	1	0.31		7	1	0.43		7	1	0.33
7	2	0.12		7	2	0.24		7	2	0.32		7	2	0.41
7	3	0.07		7	3	0.34		7	3	0.15		7	3	0.63
7	4	0.11		7	4	0.12		7	4	0.23		7	4	0.42
7	5	0.13		7	5	0.22		7	5	0.33		7	5	0.45
7	6	0.14		7	6	0.08		7	6	0.24		7	6	0.44
7	7	0.13		7	7	0.23		7	7	0.11		7	7	0.88
7	8	0.12		7	8	0.34		7	8	0.41		7	8	0.85
		0.12875				0.235				0.2775				0.55125
8	1	0.13		8	1	0.1		8	1	0.56		8	1	0.23
8	2	0.11		8	2	0.21		8	2	0.27		8	2	0.44
8	3	0.08		8	3	0.23		8	3	0.33		8	3	0.37
8	4	0.21		8	4	0.32		8	4	0.17		8	4	0.32
8	5	0.17		8	5	0.13		8	5	0.32		8	5	0.75
8	6	0.23		8	6	0.25		8	6	0.25		8	6	0.98
8	7	0.25		8	7	0.34		8	7	0.65		8	7	0.7
8	8	0.07		8	8	0.66		8	8	0.32		8	8	0.76
		0.15625				0.28				0.35875				0.56875
9	1	0.12		9	1	0.34		9	1	0.22		9	1	0.22
9	2	0.05		9	2	0.14		9	2	0.17		9	2	0.42
9	3	0.15		9	3	0.22		9	3	0.11		9	3	0.31
9	4	0.19		9	4	0.26		9	4	0.25		9	4	0.24
9	5	0.23		9	5	0.14		9	5	0.43		9	5	0.18
9	6	0.04		9	6	0.44		9	6	0.35		9	6	0.88
9	7	0.12		9	7	0.71		9	7	0.67		9	7	0.85
9	8	0.02		9	8	0.78		9	8	0.27		9	8	0.6
		0.115				0.37875				0.30875				0.4625
				10	1	0.61						10	1	0.32
				10	2	0.64						10	2	0.32
				10	3	0.33						10	3	0.44
				10	4	0.74						10	4	0.21
				10	5	0.34						10	5	0.32
				10	6	0.23						10	6	0.34
				10	7	0.54						10	7	0.34
				10	8	0.32						10	8	0.65
						0.46875								0.3675

## Sheet: Stubby Spine Density
	Tg+Vehicle				Tg+CXCL12				WT+Vehicle				WT+CXCL12
Animal #	Dendrite #	Density(1/µm)		Animal #	Dendrite #	Density(1/µm)		Animal #	Dendrite #	Density(1/µm)		Animal #	Dendrite #	Density(1/µm)
1	1	0.18		1	1	0.09		1	1	0.11		1	1	0.01
1	2	0.19		1	2	0.11		1	2	0.21		1	2	0.07
1	3	0.11		1	3	0.099		1	3	0.13		1	3	0.12
1	4	0.19		1	4	0.098		1	4	0.11		1	4	0.08
1	5	0.12		1	5	0.054		1	5	0.08		1	5	0.04
1	6	0.13		1	6	0.054		1	6	0.12		1	6	0.035
1	7	0.13		1	7	0.033		1	7	0.02		1	7	0.025
1	8	0.11		1	8	0.022		1	8	0.1		1	8	0.017
		0.145	Average			0.07				0.11				0.049625
2	1	0.12		2	1	0.09		2	1	0.09		2	1	0.13
2	2	0.45		2	2	0.056		2	2	0.14		2	2	0.13
2	3	0.18		2	3	0.056		2	3	0.09		2	3	0.19
2	4	0.09		2	4	0.098		2	4	0.03		2	4	0.16
2	5	0.19		2	5	0.012		2	5	0.09		2	5	0.12
2	6	0.1		2	6	0.098		2	6	0.11		2	6	0.08
2	7	0.19		2	7	0.023		2	7	0.1		2	7	0.12
2	8	0.17		2	8	0.018		2	8	0.09		2	8	0.16
		0.18625	Average			0.056375				0.0925				0.13625
3	1	0.18		3	1	0.12		3	1	0.04		3	1	0.13
3	2	0.12		3	2	0.076		3	2	0.08		3	2	0.38
3	3	0.18		3	3	0.06		3	3	0.15		3	3	0.07
3	4	0.27		3	4	0.04		3	4	0.08		3	4	0.11
3	5	0.16		3	5	0.13		3	5	0.09		3	5	0.08
3	6	0.26		3	6	0.12		3	6	0.07		3	6	0.22
3	7	0.17		3	7	0.16		3	7	0.023		3	7	0.11
3	8	0.3		3	8	0.16		3	8	0.12		3	8	0.14
		0.205	Average			0.10825				0.081625				0.155
4	1	0.2		4	1	0.33		4	1	0.11		4	1	0.07
4	2	0.11		4	2	0.065		4	2	0.13		4	2	0.05
4	3	0.37		4	3	0.077		4	3	0.04		4	3	0.11
4	4	0.44		4	4	0.056		4	4	0.13		4	4	0.07
4	5	0.25		4	5	0.086		4	5	0.21		4	5	0.07
4	6	0.13		4	6	0.035		4	6	0.08		4	6	0.18
4	7	0.25		4	7	0.06		4	7	0.14		4	7	0.04
4	8	0.3		4	8	0.025		4	8	0.46		4	8	0.12
		0.25625	Average			0.09175				0.1625				0.08875
5	1	0.35		5	1	0.12		5	1	0.16		5	1	0.05
5	2	0.29		5	2	0.23		5	2	0.13		5	2	0.09
5	3	0.15		5	3	0.13		5	3	0.12		5	3	0.07
5	4	0.2		5	4	0.05		5	4	0.08		5	4	0.05
5	5	0.25		5	5	0.01		5	5	0.05		5	5	0.03
5	6	0.14		5	6	0.17		5	6	0.13		5	6	0.056
5	7	0.15		5	7	0.19		5	7	0.09		5	7	0.025
5	8	0.18		5	8	0.04		5	8	0.03		5	8	0.036
		0.21375	Average			0.1175				0.09875				0.050875
6	1	0.45		6	1	0.04		6	1	0.12		6	1	0.05
6	2	0.33		6	2	0.12		6	2	0.06		6	2	0.14
6	3	0.26		6	3	0.044		6	3	0.14		6	3	0.09
6	4	0.12		6	4	0.012		6	4	0.07		6	4	0.067
6	5	0.25		6	5	0.085		6	5	0.12		6	5	0.033
6	6	0.24		6	6	0.051		6	6	0.14		6	6	0.032
6	7	0.23		6	7	0.023		6	7	0.23		6	7	0.078
6	8	0.17		6	8	0.033		6	8	0.45		6	8	0.55
		0.25625	Average			0.051				0.16625				0.13
7	1	0.35		7	1	0.088		7	1	0.12		7	1	0.078
7	2	0.33		7	2	0.099		7	2	0.14		7	2	0.077
7	3	0.16		7	3	0.078		7	3	0.23		7	3	0.058
7	4	0.25		7	4	0.056		7	4	0.12		7	4	0.055
7	5	0.25		7	5	0.076		7	5	0.17		7	5	0.044
7	6	0.14		7	6	0.012		7	6	0.23		7	6	0.08
7	7	0.23		7	7	0.11		7	7	0.11		7	7	0.063
7	8	0.43		7	8	0.23		7	8	0.2		7	8	0.043
		0.2675				0.093625				0.165				0.06225
8	1	0.13		8	1	0.088		8	1	0.03		8	1	0.034
8	2	0.16		8	2	0.1		8	2	0.12		8	2	0.031
8	3	0.23		8	3	0.096		8	3	0.1		8	3	0.055
8	4	0.19		8	4	0.088		8	4	0.14		8	4	0.044
8	5	0.14		8	5	0.076		8	5	0.15		8	5	0.034
8	6	0.13		8	6	0.091		8	6	0.14		8	6	0.23
8	7	0.14		8	7	0.051		8	7	0.05		8	7	0.023
8	8	0.11		8	8	0.034		8	8	0.04		8	8	0.05
		0.15375				0.078				0.09625				0.062625
9	1	0.12		9	1	0.088		9	1	0.06		9	1	0.034
9	2	0.11		9	2	0.1		9	2	0.1		9	2	0.031
9	3	0.12		9	3	0.032		9	3	0.09		9	3	0.021
9	4	0.14		9	4	0.043		9	4	0.1		9	4	0.012
9	5	0.23		9	5	0.076		9	5	0.07		9	5	0.034
9	6	0.12		9	6	0.045		9	6	0.16		9	6	0.04
9	7	0.21		9	7	0.051		9	7	0.05		9	7	0.023
9	8	0.09		9	8	0.034		9	8	0.09		9	8	0.05
		0.1425				0.058625				0.09				0.030625
				10	1	0.13						10	1	0.12
				10	2	0.13						10	2	0.08
				10	3	0.15						10	3	0.13
				10	4	0.11						10	4	0.13
				10	5	0.13						10	5	0.19
				10	6	0.1						10	6	0.22
				10	7	0.17						10	7	0.06
				10	8	0.05						10	8	0.1
						0.12125								0.12875

## Sheet: Spine Stats
	Test used	Sample size	P value	Statistical information
Figure 3
A	Unpaired t test with equal SD; Fisher's exact test	9	0.0031; 0.0349	CI: -0.9676 to -0.4247; r= -0.8493
B	Linear regression	9	<0.0001	F = 44.38. DFn = 1, DFd = 16
C	Unpaired t test with equal SD	19	0.0001	CI: 1.122 to 2.764
D	Unpaired t test with equal SD	19	Thin spine: <0.0001; Stubby spine: <0.0001	Thin CI: 1.773 to 3.226; Stubby CI: -1.553 to -0.8206
E	unpaired t test with equal SD	19	0.33	CI: -1.242 to 0.4417
F	Pearson's correlation	9	0.0157	CI: -0.9483 to -0.2110; r= -0.7676
G	Pearson's correlation	9	0.0038	CI: -0.9676 to -0.4247; r= -0.8493
Figure 3 supplement 2	Unpaired t test with equal SD (position discrimination)	20	0.5903	CI: -25.77 to 43.97
	Unpaired t test with equal SD (reversal)	20	0.7794	CI: -30.67 to 40.27
Figure 3 supplement 3
Position discrimination	Unpaired t test with equal SD	20	0.4895	CI: -21.48 to 10.68
Position reversal	Unpaired t test with equal SD	20	0.671	CI: -30.06 to 19.84
Shift to cue	Unpaired t test with equal SD	19	0.4007	CI: -490.9 to 206.1
Rate	Linear regression	20	0.3123	F = 1.089. DFn = 1, DFd = 16
Figure 3 supplement 4
Overall spine density	Unpaired t test with equal SD	19	0.0004	CI: 0.7154 to 2.055
Thin spine density	Unpaired t test with equal SD	19	0.0017	CI: 0.5656 to 2.049
Stubby spine density	Unpaired t test with equal SD	19	0.0992	CI: -0.6748 to 0.06399
