# Supplementary material for: CXCL12-induced rescue of cortical dendritic spines and cognitive flexibility
Source: eLife. 2020 Jan 23;9:e49717. doi: 10.7554/eLife.49717 (PMC7007222; doi:10.7554/eLife.49717)
Supplement: Figure 5—source data 1. [file elife-49717-fig5-data1.xlsx]

## Sheet: Densitometry Stats
	Test used	Sample size	P value	Statistical information
Figure 5
A (PAK1)	Ordinary one-way ANOVA	3	0.0267	F (4, 10) = 4.368
Veh vs. 5 min	Dunnett's multiple comparision test	3	0.021	CI: -1.441 to -0.1198
Veh vs. 15 min	Dunnett's multiple comparision test	3	>.999	CI: -0.6867 to 0.6340
Veh vs. 30 min	Dunnett's multiple comparision test	3	0.648	CI: -0.9142 to 0.4065
Veh vs. 60 min	Dunnett's multiple comparision test	3	>.999	CI: -0.6442 to 0.6765
A (LIMK1)	Ordinary one-way ANOVA	3	P<0.0001	F (4, 10) = 24.52
Veh vs. 5 min	Dunnett's multiple comparision test	3	0.1568	CI: -0.1051 to 0.7466
Veh vs. 15 min	Dunnett's multiple comparision test	3	0.0168	CI: -0.9503 to -0.09857
Veh vs. 30 min	Dunnett's multiple comparision test	3	0.0001	CI: -1.457 to -0.6055
Veh vs. 60 min	Dunnett's multiple comparision test	3	0.3534	CI: -0.6647 to 0.1870
A (cofilin)	Ordinary one-way ANOVA	3	<0.0001	F (4, 10) = 49.80
Veh vs. 5 min	Dunnett's multiple comparision test	3	0.5989	CI: -0.9703 to 0.4051
Veh vs. 15 min	Dunnett's multiple comparision test	3	0.0027	CI: -1.817 to -0.4418
Veh vs. 30 min	Dunnett's multiple comparision test	3	<0.0001	CI: -3.188 to -1.812
Veh vs. 60 min	Dunnett's multiple comparision test	3	<0.0001	CI: -3.189 to -1.814
B (PAK1)	Ordinary one-way ANOVA	3	0.0049	F (9, 20) = 3.977
Veh. vs. 5"	Dunnett's multiple comparision test	3	0.4651	CI;-1.622 to 0.4420
Veh. vs. 15"	Dunnett's multiple comparision test	3	0.0014	CI:-2.625 to -0.5613
Veh. vs. 30"	Dunnett's multiple comparision test	3	0.1463	CI:-1.872 to 0.1920
Veh. vs. 60"	Dunnett's multiple comparision test	3	0.5094	CI: -1.598 to 0.4661
Veh. vs. 5"+AMD	Dunnett's multiple comparision test	3	0.7982	CI:-1.448 to 0.6164
Veh. vs. 15"+AMD	Dunnett's multiple comparision test	3	>0.9999	CI:-1.017 to 1.047
Veh. vs. 30"+AMD	Dunnett's multiple comparision test	3	0.9944	CI:-1.231 to 0.8325
Veh. vs. 60"+AMD	Dunnett's multiple comparision test	3	0.9919	CI:-1.255 to 0.8091
Veh. vs. AMD	Dunnett's multiple comparision test	3	0.9999	CI: -1.071 to 0.9934
B (LIMK1)	Ordinary one-way ANOVA	3	<0.0001	F (9, 20) = 16.08
Veh. vs. 5"	Dunnett's multiple comparision test	3	0.3028	CI:-1.322 to 0.2607
Veh. vs. 15"	Dunnett's multiple comparision test	3	0.6811	CI: -1.158 to 0.4251
Veh. vs. 30"	Dunnett's multiple comparision test	3	0.707	CI:-1.147 to 0.4352
Veh. vs. 60"	Dunnett's multiple comparision test	3	<0.0001	CI: -3.023 to -1.441
Veh. vs. 5"+AMD	Dunnett's multiple comparision test	3	0.9894	CI: -0.9711 to 0.6115
Veh. vs. 15"+AMD	Dunnett's multiple comparision test	3	0.9968	CI: -0.6479 to 0.9347
Veh. vs. 30"+AMD	Dunnett's multiple comparision test	3	0.9527	CI: -0.5611 to 1.021
Veh. vs. 60"+AMD	Dunnett's multiple comparision test	3	0.9424	CI: -1.030 to 0.5522
Veh. vs. AMD	Dunnett's multiple comparision test	3	0.1763	CI: -0.1747 to 1.408
B (cofilin)	Ordinary one-way ANOVA	3	<0.0001	F (9, 20) = 8.142
Veh. vs. 5"	Dunnett's multiple comparision test	3	0.1574	CI: -1.982 to 0.2196
Veh. vs. 15"	Dunnett's multiple comparision test	3	0.0055	CI: -2.581 to -0.3786
Veh. vs. 30"	Dunnett's multiple comparision test	3	0.0003	CI: -3.090 to -0.8882
Veh. vs. 60"	Dunnett's multiple comparision test	3	0.0002	CI: -3.117 to -0.9151
Veh. vs. 5"+AMD	Dunnett's multiple comparision test	3	0.9736	CI: -1.389 to 0.8129
Veh. vs. 15"+AMD	Dunnett's multiple comparision test	3	0.4375	CI: -1.747 to 0.4549
Veh. vs. 30"+AMD	Dunnett's multiple comparision test	3	0.1938	CI: -1.939 to 0.2631
Veh. vs. 60"+AMD	Dunnett's multiple comparision test	3	0.6002	CI: -1.654 to 0.5477
Veh. vs. AMD	Dunnett's multiple comparision test	3	0.9996	CI: -1.005 to 1.197
C (PAK1)	Ordinary one-way ANOVA	3	<0.0001	F (9, 20) = 13.57
Veh. vs. 5"	Dunnett's multiple comparision test	3	<0.0001	CI: -3.243 to -1.511
Veh. vs. 15"	Dunnett's multiple comparision test	3	0.0365	CI: -1.776 to -0.04435
Veh. vs. 30"	Dunnett's multiple comparision test	3	0.1622	CI: -1.554 to 0.1776
Veh. vs. 60"	Dunnett's multiple comparision test	3	0.0008	CI: -2.277 to -0.5454
Veh. vs. 5"+PTX	Dunnett's multiple comparision test	3	0.7952	CI: -1.216 to 0.5159
Veh. vs. 15"+PTX	Dunnett's multiple comparision test	3	>0.9999	CI: -0.8825 to 0.8495
Veh. vs. 30"+PTX	Dunnett's multiple comparision test	3	0.9974	CI: -1.007 to 0.7249
Veh. vs. 60"+PTX	Dunnett's multiple comparision test	3	0.875	CI: -1.175 to 0.5572
Veh. vs. PTX	Dunnett's multiple comparision test	3	0.9997	CI: -0.9165 to 0.8156
C (LIMK1)	Ordinary one-way ANOVA	3	0.0047	F (9, 20) = 4.002
Veh. vs. 5"	Dunnett's multiple comparision test	3	0.0003	CI: -2.870 to -0.8023
Veh. vs. 15"	Dunnett's multiple comparision test	3	0.028	CI: -2.165 to -0.09686
Veh. vs. 30"	Dunnett's multiple comparision test	3	0.0853	CI: -1.975 to 0.09286
Veh. vs. 60"	Dunnett's multiple comparision test	3	0.3716	CI: -1.681 to 0.3874
Veh. vs. 5"+PTX	Dunnett's multiple comparision test	3	0.7194	CI: -1.493 to 0.5752
Veh. vs. 15"+PTX	Dunnett's multiple comparision test	3	0.3648	CI: -1.685 to 0.3831
Veh. vs. 30"+PTX	Dunnett's multiple comparision test	3	0.8	CI: -1.449 to 0.6187
Veh. vs. 60"+PTX	Dunnett's multiple comparision test	3	0.3692	CI: -1.682 to 0.3858
Veh. vs. PTX	Dunnett's multiple comparision test	3	0.6875	CI: -1.510 to 0.5585
C (cofilin)	Ordinary one-way ANOVA	3	<0.0001	F (9, 20) = 19.76
Veh. vs. 5"	Dunnett's multiple comparision test	3	0.0025	CI: -4.358 to -0.8198
Veh. vs. 15"	Dunnett's multiple comparision test	3	<0.0001	CI: -6.239 to -2.701
Veh. vs. 30"	Dunnett's multiple comparision test	3	<0.0001	CI: -6.710 to -3.171
Veh. vs. 60"	Dunnett's multiple comparision test	3	<0.0001	CI: -5.270 to -1.731
Veh. vs. 5"+PTX	Dunnett's multiple comparision test	3	0.5703	CI: -2.684 to 0.8539
Veh. vs. 15"+PTX	Dunnett's multiple comparision test	3	0.9718	CI: -2.238 to 1.301
Veh. vs. 30"+PTX	Dunnett's multiple comparision test	3	0.8321	CI: -2.448 to 1.091
Veh. vs. 60"+PTX	Dunnett's multiple comparision test	3	0.9546	CI: -2.280 to 1.258
Veh. vs. PTX	Dunnett's multiple comparision test		0.9997	CI:-1.885 to 1.654
D	Ordinary one-way ANOVA	3	0.0162	F (4, 10) = 5.158
Veh vs. 5"	Dunnett's multiple comparision test	3	0.9784	CI: -2.027 to 2.722
Veh vs. 15"	Dunnett's multiple comparision test	3	0.9907	CI: -2.650 to 2.100
Veh vs. 30"	Dunnett's multiple comparision test	3	0.4805	CI: -3.510 to 1.240
Veh vs. 60"	Dunnett's multiple comparision test	3	0.016	CI: -5.324 to -0.5741
E	Ordinary one-way ANOVA	3	0.036	F (3, 8) = 4.678
Veh vs. 1 hr	Dunnett's multiple comparision test	3	0.0259	CI: -6.048 to -0.4366
Veh vs. 2 hr	Dunnett's multiple comparision test	3	0.0464	CI: -5.660 to -0.04895
Veh vs. 3 hr	Dunnett's multiple comparision test	3	0.44	CI: -4.117 to 1.495
