# Supplementary material for: CXCL12-induced rescue of cortical dendritic spines and cognitive flexibility
Source: eLife. 2020 Jan 23;9:e49717. doi: 10.7554/eLife.49717 (PMC7007222; doi:10.7554/eLife.49717)
Supplement: Figure 6—source data 1. [file elife-49717-fig6-data1.xlsx]

## Sheet: Thin Spine Density A
	Vehicle				CXCL12
Coverslip #	Cell #	Density(1/µm)		Coverslip #	Cell #	Density(1/µm)
1	1	0.34		1	1	0.345
1	2	0.135		1	2	0.284
1	3	0.256		1	3	0.378
1	4	0.15		1	4	0.234
		0.22025				0.31025
2	1	0.124		2	1	0.365
2	2	0.222		2	2	0.403
2	3	0.123		2	3	0.328
2	4	0.199		2	4	0.322
		0.167				0.3545
3	1	0.155		3	1	0.433
3	2	0.433		3	2	0.299
3	3	0.299		3	3	0.256
3	4	0.123		3	4	0.4
		0.2525				0.347
4	1	0.25		4	1	0.274
4	2	0.144		4	2	0.355
4	3	0.299		4	3	0.321
4	4	0.21		4	4	0.309
		0.22575				0.31475
5	1	0.21		5	1	0.456
5	2	0.245		5	2	0.419
5	3	0.147		5	3	0.385
5	4	0.423		5	4	0.467
		0.25625				0.43175
6	1	0.221		6	1	0.179
6	2	0.167		6	2	0.33
6	3	0.199		6	3	0.214
6	4	0.245		6	4	0.195
		0.208				0.2295
7	1	0.345		7	1	0.451
7	2	0.265		7	2	0.401
7	3	0.245		7	3	0.367
7	4	0.323		7	4	0.399
		0.2945				0.4045
8	1	0.205		8	1	0.432
8	2	0.133		8	2	0.322
8	3	0.1954		8	3	0.432
8	4	0.1797		8	4	0.498
		0.178275				0.421
9	1	0.236		9	1	0.317
9	2	0.222		9	2	0.344
9	3	0.178		9	3	0.465
9	4	0.173		9	4	0.444
		0.20225				0.3925

## Sheet: Stubby Spine Density A
	Vehicle				CXCL12
Coverslip #	Cell #	Density(1/µm)		Coverslip #	Cell #	Density(1/µm)
1	1	0.21		1	1	0.0345
1	2	0.122		1	2	0.0384
1	3	0.145		1	3	0.0378
1	4	0.123		1	4	0.0234
		0.15				0.033525
2	1	0.178		2	1	0.0365
2	2	0.154		2	2	0.067
2	3	0.129		2	3	0.098
2	4	0.243		2	4	0.034
		0.176				0.058875
3	1	0.155		3	1	0.0678
3	2	0.149		3	2	0.0568
3	3	0.142		3	3	0.085
3	4	0.143		3	4	0.077
		0.14725				0.07165
4	1	0.09		4	1	0.086
4	2	0.09		4	2	0.066
4	3	0.032		4	3	0.051
4	4	0.09		4	4	0.076
		0.0755				0.06975
5	1	0.11		5	1	0.098
5	2	0.145		5	2	0.082
5	3	0.047		5	3	0.055
5	4	0.123		5	4	0.123
		0.10625				0.0895
6	1	0.121		6	1	0.045
6	2	0.067		6	2	0.056
6	3	0.099		6	3	0.065
6	4	0.198		6	4	0.032
		0.12125				0.0495
7	1	0.11		7	1	0.0789
7	2	0.099		7	2	0.0666
7	3	0.065		7	3	0.0654
7	4	0.087		7	4	0.0799
		0.09025				0.0727
8	1	0.055		8	1	0.103
8	2	0.054		8	2	0.111
8	3	0.0347		8	3	0.088
8	4	0.067		8	4	0.105
		0.052675				0.10175
9	1	0.085		9	1	0.131
9	2	0.076		9	2	0.086
9	3	0.044		9	3	0.1
9	4	0.068		9	4	0.2
		0.06825				0.12925

## Sheet: Overall Spine Density D
	Vehicle				CXCL12				NSC				NSC+CXCL12
Coverslip #	Cell #	Density(1/µm)		Coverslip #	Cell #	Density(1/µm)		Coverslip #	Cell #	Density(1/µm)		Coverslip #	Cell #	Density(1/µm)
1	1	0.24		1	1	0.545		1	1	0.634		1	1	0.645
1	2	0.679		1	2	0.804		1	2	0.636		1	2	0.585
1	3	0.509		1	3	0.609		1	3	0.656		1	3	0.578
1	4	0.854		1	4	0.514		1	4	0.515		1	4	0.634
		0.5705				0.618				0.61025				0.6105
2	1	0.632		2	1	0.765		2	1	0.424		2	1	0.555
2	2	0.873		2	2	0.803		2	2	0.322		2	2	0.603
2	3	0.432		2	3	0.628		2	3	0.423		2	3	0.528
2	4	0.132		2	4	0.701		2	4	0.599		2	4	0.522
		0.51725				0.72425				0.442				0.552
3	1	0.542		3	1	0.687		3	1	0.555		3	1	0.433
3	2	0.841		3	2	0.499		3	2	0.433		3	2	0.578
3	3	0.703		3	3	0.556		3	3	0.599		3	3	0.544
3	4	0.599		3	4	0.5		3	4	0.623		3	4	0.4
		0.67125				0.5605				0.5525				0.48875
4	1	0.543		4	1	0.474		4	1	0.525		4	1	0.474
4	2	0.515		4	2	0.785		4	2	0.444		4	2	0.455
4	3	0.43		4	3	0.621		4	3	0.399		4	3	0.421
4	4	0.543		4	4	0.809		4	4	0.621		4	4	0.309
		0.50775				0.67225				0.49725				0.41475
5	1	0.51		5	1	0.956		5	1	0.621		5	1	0.456
5	2	0.545		5	2	0.719		5	2	0.705		5	2	0.499
5	3	0.447		5	3	0.685		5	3	0.447		5	3	0.406
5	4	0.623		5	4	0.767		5	4	0.423		5	4	0.517
		0.53125				0.78175				0.549				0.4695
6	1	0.551		6	1	0.889		6	1	0.421		6	1	0.433
6	2	0.467		6	2	0.568		6	2	0.567		6	2	0.33
6	3	0.642		6	3	0.814		6	3	0.599		6	3	0.514
6	4	0.599		6	4	0.555		6	4	0.646		6	4	0.513
		0.56475				0.7065				0.55825				0.4475
7	1	0.645		7	1	0.951		7	1	0.645		7	1	0.351	\
7	2	0.765		7	2	0.901		7	2	0.765		7	2	0.601
7	3	0.545		7	3	0.888		7	3	0.545		7	3	0.764
7	4	0.823		7	4	0.799		7	4	0.323		7	4	0.653
		0.6945				0.88475				0.5695				0.59225
8	1	0.605		8	1	0.851		8	1	0.605		8	1	0.478
8	2	0.533		8	2	0.801		8	2	0.555		8	2	0.643
8	3	0.6954		8	3	0.767		8	3	0.5489		8	3	0.666
8	4	0.5787		8	4	0.799		8	4	0.6158		8	4	0.398
		0.603025				0.8045				0.581175				0.54625
9	1	0.636		9	1	0.717		9	1	0.436		9	1	0.617
9	2	0.522		9	2	0.744		9	2	0.444		9	2	0.644
9	3	0.478		9	3	0.865		9	3	0.378		9	3	0.745
9	4	0.573		9	4	0.844		9	4	0.573		9	4	0.624
		0.55225				0.7925				0.45775				0.6575

## Sheet: Thin Spine Density D
	Vehicle				CXCL12				NSC				NSC+CXCL12
Coverslip #	Cell #	Density(1/µm)		Coverslip #	Cell #	Density(1/µm)		Coverslip #	Cell #	Density(1/µm)		Coverslip #	Cell #	Density(1/µm)
1	1	0.24		1	1	0.245		1	1	0.234		1	1	0.145
1	2	0.279		1	2	0.404		1	2	0.236		1	2	0.285
1	3	0.309		1	3	0.309		1	3	0.256		1	3	0.278
1	4	0.154		1	4	0.314		1	4	0.315		1	4	0.34
		0.2455				0.318				0.26025				0.262
2	1	0.132		2	1	0.465		2	1	0.224		2	1	0.222
2	2	0.273		2	2	0.203		2	2	0.122		2	2	0.203
2	3	0.132		2	3	0.228		2	3	0.233		2	3	0.228
2	4	0.132		2	4	0.503		2	4	0.199		2	4	0.222
		0.16725				0.34975				0.1945				0.21875
3	1	0.242		3	1	0.367		3	1	0.222		3	1	0.133
3	2	0.241		3	2	0.399		3	2	0.215		3	2	0.223
3	3	0.203		3	3	0.234		3	3	0.247		3	3	0.194
3	4	0.299		3	4	0.5		3	4	0.123		3	4	0.1
		0.24625				0.375				0.20175				0.1625
4	1	0.242		4	1	0.272		4	1	0.222		4	1	0.272
4	2	0.115		4	2	0.444		4	2	0.194		4	2	0.255
4	3	0.203		4	3	0.231		4	3	0.146		4	3	0.121
4	4	0.243		4	4	0.309		4	4	0.256		4	4	0.109
		0.20075				0.314				0.2045				0.18925
5	1	0.21		5	1	0.456		5	1	0.122		5	1	0.156
5	2	0.245		5	2	0.419		5	2	0.203		5	2	0.199
5	3	0.147		5	3	0.365		5	3	0.177		5	3	0.106
5	4	0.333		5	4	0.467		5	4	0.123		5	4	0.117
		0.23375				0.42675				0.15625				0.1445
6	1	0.251		6	1	0.234		6	1	0.321		6	1	0.233
6	2	0.167		6	2	0.256		6	2	0.405		6	2	0.133
6	3	0.243		6	3	0.114		6	3	0.147		6	3	0.214
6	4	0.199		6	4	0.259		6	4	0.123		6	4	0.109
		0.215				0.21575				0.249				0.17225
7	1	0.245		7	1	0.451		7	1	0.233		7	1	0.115
7	2	0.265		7	2	0.401		7	2	0.219		7	2	0.201
7	3	0.342		7	3	0.388		7	3	0.199		7	3	0.264
7	4	0.123		7	4	0.399		7	4	0.264		7	4	0.253
		0.24375				0.40975				0.22875				0.20825
8	1	0.105		8	1	0.452		8	1	0.154		8	1	0.117
8	2	0.133		8	2	0.499		8	2	0.199		8	2	0.144
8	3	0.2395		8	3	0.456		8	3	0.125		8	3	0.245
8	4	0.1787		8	4	0.3		8	4	0.246		8	4	0.124
		0.16405				0.42675				0.181				0.1575
9	1	0.236		9	1	0.452		9	1	0.136		9	1	0.178
9	2	0.222		9	2	0.502		9	2	0.188		9	2	0.243
9	3	0.278		9	3	0.333		9	3	0.178		9	3	0.222
9	4	0.173		9	4	0.294		9	4	0.205		9	4	0.198
		0.22725				0.39525				0.17675				0.21025

## Sheet: Stubby Spine Density D
	Vehicle				CXCL12				NSC				NSC+CXCL12
Coverslip #	Cell #	Density(1/µm)		Coverslip #	Cell #	Density(1/µm)		Coverslip #	Cell #	Density(1/µm)		Coverslip #	Cell #	Density(1/µm)
1	1	0.14		1	1	0.045		1	1	0.098		1	1	0.145
1	2	0.179		1	2	0.021		1	2	0.096		1	2	0.085
1	3	0.156		1	3	0.056		1	3	0.1		1	3	0.078
1	4	0.114		1	4	0.044		1	4	0.088		1	4	0.104
		0.14725				0.0415				0.0955				0.103
2	1	0.192		2	1	0.021		2	1	0.085		2	1	0.102
2	2	0.243		2	2	0.023		2	2	0.056		2	2	0.054
2	3	0.132		2	3	0.055		2	3	0.109		2	3	0.099
2	4	0.132		2	4	0.03		2	4	0.199		2	4	0.234
		0.17475				0.03225				0.11225				0.12225
3	1	0.142		3	1	0.0667		3	1	0.11		3	1	0.065
3	2	0.141		3	2	0.0599		3	2	0.076		3	2	0.098
3	3	0.103		3	3	0.0534		3	3	0.094		3	3	0.054
3	4	0.199		3	4	0.05		3	4	0.087		3	4	0.1
		0.14625				0.0575				0.09175				0.07925
4	1	0.09		4	1	0.0672		4	1	0.086		4	1	0.104
4	2	0.115		4	2	0.084		4	2	0.034		4	2	0.089
4	3	0.05		4	3	0.0831		4	3	0.127		4	3	0.045
4	4	0.064		4	4	0.0709		4	4	0.087		4	4	0.109
		0.07975				0.0763				0.0835				0.08675
5	1	0.11		5	1	0.0456		5	1	0.104		5	1	0.034
5	2	0.145		5	2	0.0419		5	2	0.103		5	2	0.098
5	3	0.093		5	3	0.0365		5	3	0.087		5	3	0.098
5	4	0.103		5	4	0.167		5	4	0.123		5	4	0.117
		0.11275				0.07275				0.10425				0.08675
6	1	0.151		6	1	0.078		6	1	0.101		6	1	0.133
6	2	0.167		6	2	0.089		6	2	0.077		6	2	0.052
6	3	0.143		6	3	0.053		6	3	0.088		6	3	0.066
6	4	0.099		6	4	0.259		6	4	0.065		6	4	0.109
		0.14				0.11975				0.08275				0.09
7	1	0.045		7	1	0.065		7	1	0.111		7	1	0.05
7	2	0.105		7	2	0.088		7	2	0.103		7	2	0.084
7	3	0.111		7	3	0.093		7	3	0.134		7	3	0.099
7	4	0.123		7	4	0.299		7	4	0.164		7	4	0.046
		0.096				0.13625				0.128				0.06975
8	1	0.045		8	1	0.099		8	1	0.124		8	1	0.055
8	2	0.054		8	2	0.087		8	2	0.149		8	2	0.067
8	3	0.094		8	3	0.077		8	3	0.125		8	3	0.087
8	4	0.087		8	4	0.089		8	4	0.146		8	4	0.074
		0.07				0.088				0.136				0.07075
9	1	0.088		9	1	0.052		9	1	0.103		9	1	0.089
9	2	0.054		9	2	0.098		9	2	0.109		9	2	0.076
9	3	0.089		9	3	0.088		9	3	0.134		9	3	0.061
9	4	0.067		9	4	0.086		9	4	0.095		9	4	0.073
		0.0745				0.081				0.11025				0.07475

## Sheet: Overall Spine Density E
	Vehicle				CXCL12				NSC				NSC+CXCL12
Coverslip #	Cell #	Density(1/µm)		Coverslip #	Cell #	Density(1/µm)		Coverslip #	Cell #	Density(1/µm)		Coverslip #	Cell #	Density(1/µm)
1	1	0.24		1	1	0.845		1	1	0.634		1	1	0.343
1	2	0.679		1	2	0.904		1	2	0.636		1	2	0.285
1	3	0.579		1	3	0.809		1	3	0.656		1	3	0.578
1	4	0.854		1	4	0.514		1	4	0.515		1	4	0.634
		0.588				0.768				0.61025				0.46
2	1	0.639		2	1	0.865		2	1	0.424		2	1	0.555
2	2	0.873		2	2	0.803		2	2	0.422		2	2	0.503
2	3	0.432		2	3	0.728		2	3	0.423		2	3	0.528
2	4	0.132		2	4	0.701		2	4	0.599		2	4	0.522
		0.519				0.77425				0.467				0.527
3	1	0.598		3	1	0.887		3	1	0.555		3	1	0.433
3	2	0.908		3	2	0.799		3	2	0.433		3	2	0.578
3	3	0.703		3	3	0.956		3	3	0.505		3	3	0.544
3	4	0.599		3	4	0.3		3	4	0.623		3	4	0.4
		0.702				0.7355				0.529				0.48875
4	1	0.543		4	1	0.774		4	1	0.525		4	1	0.474
4	2	0.515		4	2	0.785		4	2	0.444		4	2	0.415
4	3	0.64		4	3	0.921		4	3	0.399		4	3	0.401
4	4	0.543		4	4	0.809		4	4	0.621		4	4	0.309
		0.56025				0.82225				0.49725				0.39975
5	1	0.61		5	1	0.956		5	1	0.621		5	1	0.456
5	2	0.745		5	2	0.719		5	2	0.705		5	2	0.499
5	3	0.447		5	3	0.999		5	3	0.447		5	3	0.406
5	4	0.623		5	4	0.767		5	4	0.523		5	4	0.317
		0.60625				0.86025				0.574				0.4195
6	1	0.651		6	1	0.999		6	1	0.421		6	1	0.433
6	2	0.567		6	2	0.976		6	2	0.467		6	2	0.39
6	3	0.682		6	3	0.614		6	3	0.559		6	3	0.514
6	4	0.599		6	4	0.655		6	4	0.646		6	4	0.513
		0.62475				0.811				0.52325				0.4625
7	1	0.645		7	1	0.951		7	1	0.454		7	1	0.351
7	2	0.765		7	2	0.901		7	2	0.565		7	2	0.401
7	3	0.645		7	3	0.888		7	3	0.545		7	3	0.664
7	4	0.823		7	4	0.908		7	4	0.323		7	4	0.653
		0.7195				0.912				0.47175				0.51725
8	1	0.805		8	1	0.951		8	1	0.605		8	1	0.578
8	2	0.633		8	2	0.901		8	2	0.755		8	2	0.643
8	3	0.7954		8	3	0.967		8	3	0.5489		8	3	0.666
8	4	0.878		8	4	0.999		8	4	0.6158		8	4	0.598
		0.77785				0.9545				0.631175				0.62125
9	1	0.636		9	1	1.04		9	1	0.736		9	1	0.317
9	2	0.822		9	2	0.965		9	2	0.777		9	2	0.344
9	3	0.965		9	3	0.999		9	3	0.588		9	3	0.445
9	4	0.773		9	4	0.988		9	4	0.513		9	4	0.324
		0.799				0.998				0.6535				0.3575

## Sheet: Thin Spine Density E
	Vehicle				CXCL12				NSC				NSC+CXCL12
Coverslip #	Cell #	Density(1/µm)		Coverslip #	Cell #	Density(1/µm)		Coverslip #	Cell #	Density(1/µm)		Coverslip #	Cell #	Density(1/µm)
1	1	0.24		1	1	0.245		1	1	0.134		1	1	0.145
1	2	0.279		1	2	0.374		1	2	0.136		1	2	0.185
1	3	0.309		1	3	0.309		1	3	0.256		1	3	0.178
1	4	0.2		1	4	0.304		1	4	0.315		1	4	0.104
		0.257				0.308				0.21025				0.153
2	1	0.132		2	1	0.465		2	1	0.224		2	1	0.122
2	2	0.273		2	2	0.203		2	2	0.122		2	2	0.103
2	3	0.132		2	3	0.228		2	3	0.233		2	3	0.108
2	4	0.132		2	4	0.503		2	4	0.199		2	4	0.222
		0.16725				0.34975				0.1945				0.13875
3	1	0.242		3	1	0.367		3	1	0.122		3	1	0.133
3	2	0.141		3	2	0.399		3	2	0.115		3	2	0.223
3	3	0.203		3	3	0.234		3	3	0.247		3	3	0.194
3	4	0.299		3	4	0.4		3	4	0.123		3	4	0.1
		0.22125				0.35				0.15175				0.1625
4	1	0.242		4	1	0.372		4	1	0.122		4	1	0.272
4	2	0.115		4	2	0.444		4	2	0.194		4	2	0.255
4	3	0.203		4	3	0.231		4	3	0.146		4	3	0.121
4	4	0.243		4	4	0.309		4	4	0.156		4	4	0.149
		0.20075				0.339				0.1545				0.19925
5	1	0.41		5	1	0.456		5	1	0.122		5	1	0.136
5	2	0.245		5	2	0.219		5	2	0.203		5	2	0.104
5	3	0.197		5	3	0.365		5	3	0.177		5	3	0.106
5	4	0.333		5	4	0.467		5	4	0.123		5	4	0.117
		0.29625				0.37675				0.15625				0.11575
6	1	0.251		6	1	0.234		6	1	0.121		6	1	0.233
6	2	0.167		6	2	0.299		6	2	0.105		6	2	0.133
6	3	0.243		6	3	0.314		6	3	0.147		6	3	0.214
6	4	0.199		6	4	0.159		6	4	0.193		6	4	0.109
		0.215				0.2515				0.1415				0.17225
7	1	0.145		7	1	0.251		7	1	0.133		7	1	0.115
7	2	0.165		7	2	0.451		7	2	0.119		7	2	0.101
7	3	0.142		7	3	0.188		7	3	0.099		7	3	0.164
7	4	0.123		7	4	0.199		7	4	0.104		7	4	0.103
		0.14375				0.27225				0.11375				0.12075
8	1	0.105		8	1	0.252		8	1	0.154		8	1	0.117
8	2	0.133		8	2	0.399		8	2	0.054		8	2	0.144
8	3	0.2395		8	3	0.356		8	3	0.125		8	3	0.145
8	4	0.1787		8	4	0.2		8	4	0.146		8	4	0.024
		0.16405				0.30175				0.11975				0.1075
9	1	0.106		9	1	0.152		9	1	0.136		9	1	0.108
9	2	0.102		9	2	0.202		9	2	0.078		9	2	0.143
9	3	0.178		9	3	0.333		9	3	0.108		9	3	0.122
9	4	0.173		9	4	0.394		9	4	0.105		9	4	0.098
		0.13975				0.27025				0.10675				0.11775

## Sheet: Stubby Spine Density E
	Vehicle				CXCL12				NSC				NSC+CXCL12
Coverslip #	Cell #	Density(1/µm)		Coverslip #	Cell #	Density(1/µm)		Coverslip #	Cell #	Density(1/µm)		Coverslip #	Cell #	Density(1/µm)
1	1	0.14		1	1	0.045		1	1	0.098		1	1	0.145
1	2	0.084		1	2	0.021		1	2	0.096		1	2	0.085
1	3	0.106		1	3	0.056		1	3	0.1		1	3	0.078
1	4	0.076		1	4	0.074		1	4	0.102		1	4	0.104
		0.1015				0.049				0.099				0.103
2	1	0.103		2	1	0.021		2	1	0.085		2	1	0.102
2	2	0.043		2	2	0.023		2	2	0.056		2	2	0.054
2	3	0.032		2	3	0.055		2	3	0.109		2	3	0.099
2	4	0.132		2	4	0.03		2	4	0.199		2	4	0.134
		0.0775				0.03225				0.11225				0.09725
3	1	0.054		3	1	0.0667		3	1	0.11		3	1	0.099
3	2	0.054		3	2	0.0599		3	2	0.076		3	2	0.098
3	3	0.066		3	3	0.0534		3	3	0.094		3	3	0.079
3	4	0.099		3	4	0.08		3	4	0.087		3	4	0.088
		0.06825				0.065				0.09175				0.091
4	1	0.09		4	1	0.0672		4	1	0.086		4	1	0.104
4	2	0.087		4	2	0.084		4	2	0.034		4	2	0.089
4	3	0.087		4	3	0.0931		4	3	0.095		4	3	0.045
4	4	0.089		4	4	0.0709		4	4	0.087		4	4	0.109
		0.08825				0.0788				0.0755				0.08675
5	1	0.11		5	1	0.0456		5	1	0.104		5	1	0.1
5	2	0.045		5	2	0.0419		5	2	0.103		5	2	0.098
5	3	0.093		5	3	0.0876		5	3	0.087		5	3	0.098
5	4	0.103		5	4	0.098		5	4	0.123		5	4	0.117
		0.08775				0.068275				0.10425				0.10325
6	1	0.051		6	1	0.058		6	1	0.087		6	1	0.133
6	2	0.067		6	2	0.029		6	2	0.077		6	2	0.052
6	3	0.143		6	3	0.053		6	3	0.066		6	3	0.086
6	4	0.099		6	4	0.059		6	4	0.065		6	4	0.109
		0.09				0.04975				0.07375				0.095
7	1	0.045		7	1	0.065		7	1	0.091		7	1	0.05
7	2	0.105		7	2	0.018		7	2	0.056		7	2	0.084
7	3	0.077		7	3	0.043		7	3	0.087		7	3	0.099
7	4	0.123		7	4	0.0299		7	4	0.087		7	4	0.143
		0.0875				0.038975				0.08025				0.094
8	1	0.045		8	1	0.099		8	1	0.03		8	1	0.055
8	2	0.054		8	2	0.027		8	2	0.054		8	2	0.067
8	3	0.054		8	3	0.017		8	3	0.077		8	3	0.032
8	4	0.087		8	4	0.029		8	4	0.146		8	4	0.074
		0.06				0.043				0.07675				0.057
9	1	0.088		9	1	0.052		9	1	0.103		9	1	0.089
9	2	0.054		9	2	0.098		9	2	0.032		9	2	0.167
9	3	0.089		9	3	0.088		9	3	0.055		9	3	0.104
9	4	0.067		9	4	0.086		9	4	0.095		9	4	0.073
		0.0745				0.081				0.07125				0.10825

## Sheet: Stats
	Test used	Sample size	P value	Statistical information
Figure 6
A
Thin spine	Unpaired t test with equal SD	3	<0.0001	CI: 0.8454 to 1.927
Stubby spine	Unpaired t test with equal SD	3	0.0432	CI: -0.7239 to -0.01268
C (PAK1)	Ordinary one-way ANOVA	3	0.0039	F (9, 20) = 6.391
Veh. vs. 5"	Dunnett's multiple comparision test	3	0.7002	CI: -1.643 to 0.6817
Veh. vs. 15"	Dunnett's multiple comparision test	3	0.0014	CI: -3.192 to -0.8672
Veh. vs. 30"	Dunnett's multiple comparision test	3	0.9106	CI: -1.505 to 0.8193
Veh. vs. 60"	Dunnett's multiple comparision test	3	0.7592	CI:-1.609 to 0.7158
Veh. vs. 5"_NSC	Dunnett's multiple comparision test	3	0.9846	CI: -0.9181 to 1.407
Veh. vs. 15"+NSC	Dunnett's multiple comparision test	3	0.7615	CI: -1.607 to 0.7172
Veh. vs. 30"+NSC	Dunnett's multiple comparision test	3	>0.9999	CI: -1.143 to 1.182
Veh. vs. 60"+NSC	Dunnett's multiple comparision test	3	0.6543	CI: -1.669 to 0.6557
Veh. vs. NSC	Dunnett's multiple comparision test	3	0.9996	CI: -1.051 to 1.273
C (LIMK1)	Ordinary one-way ANOVA	3	0.0001	F (9, 20) = 7.222
Veh. vs. 5"	Dunnett's multiple comparision test	3	0.034	CI:-4.046 to -0.1234
Veh. vs. 15"	Dunnett's multiple comparision test	3	0.0251	CI: -4.140 to -0.2182
Veh. vs. 30"	Dunnett's multiple comparision test	3	0.7373	CI: -2.814 to 1.108
Veh. vs. 60"	Dunnett's multiple comparision test	3	0.0002	CI: -5.705 to -1.782
Veh. vs. 5"_NSC	Dunnett's multiple comparision test	3	0.9592	CI: -2.516 to 1.406
Veh. vs. 15"+NSC	Dunnett's multiple comparision test	3	>0.9999	CI: -2.001 to 1.922
Veh. vs. 30"+NSC	Dunnett's multiple comparision test	3	0.9996	CI: -2.148 to 1.774
Veh. vs. 60"+NSC	Dunnett's multiple comparision test	3	0.9975	CI: -2.274 to 1.648
Veh. vs. NSC	Dunnett's multiple comparision test	3	>0.9999	CI: -1.946 to 1.976
C (cofilin)	Ordinary one-way ANOVA	3	<0.0001	F (9, 20) = 10.99
Veh. vs. 5"	Dunnett's multiple comparision test	3	0.0265	CI: -4.950 to -0.2407
Veh. vs. 15"	Dunnett's multiple comparision test	3	0.0005	CI:-6.341 to -1.632
Veh. vs. 30"	Dunnett's multiple comparision test	3	<0.0001	CI: -7.648 to -2.939
Veh. vs. 60"	Dunnett's multiple comparision test	3	0.0063	CI: -5.474 to -0.7653
Veh. vs. 5"_NSC	Dunnett's multiple comparision test	3	0.8397	CI: -3.247 to 1.462
Veh. vs. 15"+NSC	Dunnett's multiple comparision test	3	0.6887	CI: -3.435 to 1.274
Veh. vs. 30"+NSC	Dunnett's multiple comparision test	3	0.9996	CI: -2.601 to 2.108
Veh. vs. 60"+NSC	Dunnett's multiple comparision test	3	0.9972	CI: -2.755 to 1.954
Veh. vs. NSC	Dunnett's multiple comparision test	3	>0.9999	CI: -2.340 to 2.369
D (Overall)	Ordinary one-way ANOVA	3	<0.0001	F (3, 32) = 13.44
Vehicle vs. CXCL12	Tukey's multiple comparison's test	3	0.0009	CI: -2.575 to -0.5714
Vehicle vs. NSC	Tukey's multiple comparison's test	3	0.7252	CI: -0.6159 to 1.388
Vehicle vs. NSC+CXCL12	Tukey's multiple comparison's test	3	0.5364	CI: -0.5012 to 1.503
CXCL12 vs. NSC	Tukey's multiple comparison's test	3	<0.0001	CI: 0.9575 to 2.961
CXCL12 vs. NSC+CXCL12	Tukey's multiple comparison's test	3	<0.0001	CI: 1.072 to 3.076
NSC vs. NSC+CXCL12	Tukey's multiple comparison's test	3	0.9894	CI: -0.8872 to 1.117
D (Thin)	Ordinary one-way ANOVA	3	<0.0001	F (3, 32) = 23.54
Vehicle vs. CXCL12	Tukey's multiple comparison's test	3	<0.0001	CI: -1.995 to -0.7777
Vehicle vs. NSC	Tukey's multiple comparison's test	3	0.9044	CI: -0.4561 to 0.7611
Vehicle vs. NSC+CXCL12	Tukey's multiple comparison's test	3	0.6407	CI: -0.3425 to 0.8747
CXCL12 vs. NSC	Tukey's multiple comparison's test	3	<0.0001	CI: 0.9301 to 2.147
CXCL12 vs. NSC+CXCL12	Tukey's multiple comparison's test	3	<0.0001	CI: 1.044 to 2.261
NSC vs. NSC+CXCL12	Tukey's multiple comparison's test	3		CI: -0.4950 to 0.7223
D (Stubby)	Ordinary one-way ANOVA	3	0.042	F (3, 32) = 3.063
Vehicle vs. CXCL12	Tukey's multiple comparison's test	3	0.0483	CI: 0.002065 to 0.7345
Vehicle vs. NSC	Tukey's multiple comparison's test	3	0.9789	CI: -0.3129 to 0.4195
Vehicle vs. NSC+CXCL12	Tukey's multiple comparison's test	3	0.3787	CI: -0.1464 to 0.5861
CXCL12 vs. NSC	Tukey's multiple comparison's test	3	0.1122	CI: -0.6812 to 0.05122
CXCL12 vs. NSC+CXCL12	Tukey's multiple comparison's test	3	0.6932	CIL -0.5147 to 0.2178
NSC vs. NSC+CXCL12	Tukey's multiple comparison's test	3	0.6115	CI: -0.1997 to 0.5328
E (Overall)	Ordinary one-way ANOVA	3	<0.0001	F (3, 32) = 34.91
Vehicle vs. CXCL12	Tukey's multiple comparison's test	3	0.0001	CI: -2.964 to -0.8650
Vehicle vs. Vehicle rac1 shRNA	Tukey's multiple comparison's test	3	0.0412	CI: 0.03308 to 2.133
Vehicle vs. CXCL12 rac1 shRNA	Tukey's multiple comparison's test	3	0.0003	CI: 0.7552 to 2.855
CXCL12 vs. Vehicle rac1 shRNA	Tukey's multiple comparison's test	3	<0.0001	CI: 1.948 to 4.047
CXCL12 vs. CXCL12 rac1 shRNA	Tukey's multiple comparison's test	3	<0.0001	CI: 2.670 to 4.769
Vehicle rac1 shRNA vs. CXCL12 rac1 shRNA	Tukey's multiple comparison's test	3	0.2635	CI: -0.3276 to 1.772
E (Thin)	Ordinary one-way ANOVA	3	<0.0001	F (3, 32) = 36.03
Vehicle vs. CXCL12	Tukey's multiple comparison's test	3	<0.0001	CI: -1.670 to -0.6439
Vehicle vs. Vehicle rac1 shRNA	Tukey's multiple comparison's test	3	0.0527	CI: -0.004426 to 1.022
Vehicle vs. CXCL12 rac1 shRNA	Tukey's multiple comparison's test	3	0.0204	CI: 0.07210 to 1.099
CXCL12 vs. Vehicle rac1 shRNA	Tukey's multiple comparison's test	3	<0.0001	CI: 1.153 to 2.179
CXCL12 vs. CXCL12 rac1 shRNA	Tukey's multiple comparison's test	3	<0.0001	CI: 1.229 to 2.256
Vehicle rac1 shRNA vs. CXCL12 rac1 shRNA	Tukey's multiple comparison's test	3	0.9773	CI: -0.4367 to 0.5897
E (Stubby)	Ordinary one-way ANOVA	3	<0.0001	F (3, 32) = 9.993
Vehicle vs. CXCL12	Tukey's multiple comparison's test	3	0.0119	CI: 0.04768 to 0.4799
Vehicle vs. Vehicle rac1 shRNA	Tukey's multiple comparison's test	3	0.8135	CI: -0.2865 to 0.1457
Vehicle vs. CXCL12 rac1 shRNA	Tukey's multiple comparison's test	3	0.277	CI: -0.3623 to 0.06990
CXCL12 vs. Vehicle rac1 shRNA	Tukey's multiple comparison's test	3	0.0011	CI: -0.5503 to -0.1181
CXCL12 vs. CXCL12 rac1 shRNA	Tukey's multiple comparison's test	3	<0.0001	CI: -0.6261 to -0.1939
Vehicle rac1 shRNA vs. CXCL12 rac1 shRNA	Tukey's multiple comparison's test	3	0.7784	CI: -0.2919 to 0.1403
