# Supplementary material for: CXCL12-induced rescue of cortical dendritic spines and cognitive flexibility
Source: eLife. 2020 Jan 23;9:e49717. doi: 10.7554/eLife.49717 (PMC7007222; doi:10.7554/eLife.49717)
Supplement: Figure 7—source data 1. [file elife-49717-fig7-data1.xlsx]

## Sheet: pPAK1 in NeuN+ Cells 
			Vehicle				CXCL12
		Animal #	Image #	Avg Signal		Animal #	Image #	Avg Signal
		1	1	70.3432		1	1	5.23597
		1	2	43.2326		1	2	30.5868			WT Vehicle	Tg vehicle	WT CXCL12	Tg CXCL12
		1	3	35.5765		1	3	111.482		Rats N=	4	4	4	4
		1	4	10.2848		1	4	120.265
		1	5	3.57681		1	5	55.4288
		1	6	11.5665		1	6	44.0732
				29.0967				61.1787
		2	1	108.974		2	1	77.8009
		2	2	102.334		2	2	73.3644
		2	3	31.6236		2	3	83.1514
		2	4	37.1527		2	4	52.8644
		2	5	44.0273		2	5	59.5875
		2	6	36.2853		2	6	63.3604
				60.066				68.3548
		3	1	16.1496		3	1	46.257
		3	2	14.5852		3	2	50.8383
		3	3	14.3723		3	3	71.7357
		3	4	22.101		3	4	41.1494
		3	5	22.0723		3	5	37.4382
		3	6	19.1919		3	6	76.8858
				18.0787				54.0507
		4	1	72.7884		4	1	33.7516
		4	2	82.6906		4	2	27.8044
		4	3	71.1171		4	3	30.418
		4	4	67.3579		4	4	169.796
		4	5	80.3724		4	5	107.399
		4	6	50.3521		4	6	136.037
				70.7797				84.2012
		5	1	96.7153		5	1	154.904
		5	2	100.486		5	2	158.592
		5	3	121.888		5	3	89.1616
		5	4	57.9698		5	4	151.155
		5	5	62.3709		5	5	11.7517
		5	6	59.9013		5	6	21.3448
				83.2219				97.8184
		6	1	44.1131		6	1	172.788
		6	2	63.3473		6	2	182.691
		6	3	77.5818		6	3	71.1171
		6	4	30.6773		6	4	67.3579
		6	5	29.5187		6	5	80.3724
		6	6	47.9128		6	6	150.352
				48.8585				120.78
						7	1	137.843
		7	1	33.5839		7	2	172.943
		7	2	55.6949		7	3	9.75148
		7	3	44.3949		7	4	37.9689
		7	4	30.6773		7	5	124.627
		7	5	33.5933		7	6	120.112
		7	6	53.595				100.541
				41.9232		8	1	130.591
		8	1	47.595		8	2	150.584
		8	2	32.493		8	3	93.1956
		8	3	35.5765		8	4	75.6632
		8	4	26.596		8	5	131.628
		8	5	32.593		8	6	135.832
		8	6	9.4983				119.582
				30.7253

## Sheet: Pilot Study
Figure 7--figure supplement 1
		Vehicle				5ug/uL				10ug/uL
	Animal #	Image #	Avg Signal		Animal #	Image #	Avg Signal		Animal #	Image #	Avg Signal
	1	1	84.7994		1	1	108.974		1	1	48.3013
	1	2	89.3681		1	2	82.3338		1	2	41.4025
	1	3	170.878		1	3	31.6236		1	3	87.4115
	1	4	82.6628		1	4	37.1527		1	4	30.2914
	1	5	67.0714		1	5	44.0273		1	5	36.01
	1	6	88.4937		1	6	36.2853		1	6	35.6614
			97.2122				56.7327				46.513
	2	1	133.752		2	1	135.236		2	1	70.3432
	2	2	127.804		2	2	30.5868		2	2	43.2326
	2	3	130.418		2	3	111.482		2	3	35.5765
	2	4	169.796		2	4	120.265		2	4	10.2848
	2	5	147.399		2	5	95.4288		2	5	3.57681
	2	6	166.037		2	6	74.0732		2	6	11.5665
			145.868				94.512				29.0967

## Sheet: Stats
	Test used	Sample size	P value	Statistical information
Figure 7
A (by treatment)	Unpaired t test with equal SD	16	0.0121	CI: 9.355 to 64.00"
A (by genotype & treatment)	Ordinary one-way ANOVA	16	0.0001	F(3,12)= 17.86
WT+Veh vs. WT+CXCL12	Tukey's multiple comparison test		0.0216	CI: -67.42 to -5.051
WT+Veh vs. Tg+Veh	Tukey's multiple comparison test		0.0105	CI: 9.381 to 71.75
WT+Veh vs. Tg+CXCL12	Tukey's multiple comparison test		0.9872	CI: -27.74 to 34.63
WT+CXCL12 vs. Tg+Veh	Tukey's multiple comparison test		<0.0001	CI: 45.62 to 108.0
WT+CXCL12 vs. Tg+CXCL12	Tukey's multiple comparison test		0.0122	CI: 8.497 to 70.86
Tg+Veh vs. Tg+CXCL12	Tukey's multiple comparison test		0.0186	CI: -68.30 to -5.936
B	Pearson's correlation	14	0.0372	CI: 0.04221 to 0.8409; r= 0.5602
C	Pearson's correlation	14	0.0404	CI:-0.8376 to -0.03120; r= -0.5526
