# Supplementary material for: CXCL12-induced rescue of cortical dendritic spines and cognitive flexibility
Source: eLife. 2020 Jan 23;9:e49717. doi: 10.7554/eLife.49717 (PMC7007222; doi:10.7554/eLife.49717)
Supplement: Figure 8—source data 1. [file elife-49717-fig8-data1.xlsx]

## Sheet: WT Behavior
Figure 8
Figure 8 - figure supplement 2
1. Rats are trained to lever press for food reward (45 mg sucrose pellets) in the absence of cue
2. Position Discrimination: Rats must press one of the levers (left or right, no cues present)
3. Reversal: Rats are given 20 reminder trials of previous rule, then must press the opposite lever in order to receive reward
3. Set shift to cue: Rats are given 20 position reminder trials, then must shift to press the lever associated with the cue (tone) in order to receive reward
Criterion for each phase = 10 consecutive correct responses
Cannula implant surgeries occur 1-2 weeks prior to onset of position discrimination
CXCL12 or veh treatments begin 1 day prior to position discrimination
NSC23766 or veh treatments begin 1 day prior to CXCL12/veh treatments
Position discrimination
Rat ID	Treatment	Rule (Correct Lever)	Trials to Criterion (TTC)			Rat ID	Treatment	Rule (Correct Lever)	Trials to Criterion (TTC)
2	veh + veh	Left	33			3	NSC23766 + veh	Left	30
11	veh + veh	Right	47			4	NSC23766 + veh	Left	44
12	veh + veh	Right	23			9	NSC23766 + veh	Left	53
15	veh + veh	Right	32			14	NSC23766 + veh	Right	52
1	veh + veh	Right	59			2	NSC23766 + veh	Left	48
7	veh + veh	Right	47			8	NSC23766 + veh	Left	49
9	veh + veh	Left	50			12	NSC23766 + veh	Right	77
10	veh + veh	Left	13			13	NSC23766 + veh	Left	33
2	veh + veh	Right	66			1	NSC23766 + veh	Left	66
7	veh + veh	Left	45			4	NSC23766 + veh	Left	47
9	veh + veh	Left	27			5	NSC23766 + veh	Left	45
11	veh + veh	Left	93			10	NSC23766 + veh	Left	54
			44.5833	AVG					49.8333	AVG
			21.5679	ST DEV					12.7124	ST DEV
			6.22612	SEM					3.66976	SEM
Rat ID	Treatment	Rule (Correct Lever)	Trials to Criterion (TTC)			Rat ID	Treatment	Rule (Correct Lever)	Trials to Criterion (TTC)
1	veh + CXCL12	Right	46			5	NSC23766 + CXCL12	Left	119
6	veh + CXCL12	Left	44			7	NSC23766 + CXCL12	Left	67
8	veh + CXCL12	Left	88			10	NSC23766 + CXCL12	Left	86
16	veh + CXCL12	Left	44			13	NSC23766 + CXCL12	Left	16
4	veh + CXCL12	Left	76			3	NSC23766 + CXCL12	Right	46
5	veh + CXCL12	Left	64			6	NSC23766 + CXCL12	Left	45
11	veh + CXCL12	Right	10			14	NSC23766 + CXCL12	Right	73
16	veh + CXCL12	Left	59			15	NSC23766 + CXCL12	Left	54
3	veh + CXCL12	Right	108			8	NSC23766 + CXCL12	Left	40
6	veh + CXCL12	Right	100			12	NSC23766 + CXCL12	Left	38
14	veh + CXCL12	Left	45			13	NSC23766 + CXCL12	Right	78
16	veh + CXCL12	Left	53			15	NSC23766 + CXCL12	Right	37
			61.4167	AVG					58.25	AVG
			27.6651	ST DEV					27.746	ST DEV
			7.98622	SEM					8.00958	SEM
Reversal
Date: 1/9/18
Rat ID	Treatment	Rule (Correct Lever)	Trials to Criterion (TTC)			Rat ID	Treatment	Rule (Correct Lever)	Trials to Criterion (TTC)
2	veh + veh	Right	98			3	NSC23766 + veh	Right	127
11	veh + veh	Left	59			4	NSC23766 + veh	Right	78
12	veh + veh	Left	108			9	NSC23766 + veh	Right	101
15	veh + veh	Left	53			14	NSC23766 + veh	Left	55
1	veh + veh	Left	73			2	NSC23766 + veh	Right	71
7	veh + veh	Left	82			8	NSC23766 + veh	Right	76
9	veh + veh	Right	93			12	NSC23766 + veh	Left	99
10	veh + veh	Right	51			13	NSC23766 + veh	Right	91
2	veh + veh	Left	99			1	NSC23766 + veh	Right	83
7	veh + veh	Right	60			4	NSC23766 + veh	Right	73
9	veh + veh	Right	89			5	NSC23766 + veh	Right	34
11	veh + veh	Right	150			10	NSC23766 + veh	Right	91
			84.5833	AVG					81.5833	AVG
			28.3339	ST DEV					23.593	ST DEV
			8.1793	SEM					6.81071	SEM
Rat ID	Treatment	Rule (Correct Lever)	Trials to Criterion (TTC)			Rat ID	Treatment	Rule (Correct Lever)	Trials to Criterion (TTC)
1	veh + CXCL12	Left	68			5	NSC23766 + CXCL12	Right	70
6	veh + CXCL12	Right	59			7	NSC23766 + CXCL12	Right	132
8	veh + CXCL12	Right	89			10	NSC23766 + CXCL12	Right	56
16	veh + CXCL12	Right	123			13	NSC23766 + CXCL12	Right	77
4	veh + CXCL12	Right	102			3	NSC23766 + CXCL12	Left	62
5	veh + CXCL12	Right	87			6	NSC23766 + CXCL12	Right	76
11	veh + CXCL12	Left	60			14	NSC23766 + CXCL12	Left	73
16	veh + CXCL12	Right	118			15	NSC23766 + CXCL12	Right	90
3	veh + CXCL12	Left	77			8	NSC23766 + CXCL12	Right	89
6	veh + CXCL12	Left	152			12	NSC23766 + CXCL12	Right	93
14	veh + CXCL12	Right	107			13	NSC23766 + CXCL12	Left	155
16	veh + CXCL12	Right	121			15	NSC23766 + CXCL12	Left	82
			96.9167	AVG					87.9167	AVG
			28.7005	ST DEV					28.6117	ST DEV
			8.28513	SEM					8.25948	SEM
Shift to cue
Date: 1/10 - 1/19/18
Rat ID	Treatment	Rule (Correct Lever)	Trials to Criterion (TTC)			Rat ID	Treatment	Rule (Correct Lever)	Trials to Criterion (TTC)
2	veh + veh	N/A	1500			3	NSC23766 + veh	N/A	871
11	veh + veh	N/A	962			4	NSC23766 + veh	N/A	1500
12	veh + veh	N/A	1289			9	NSC23766 + veh	N/A	1500
15	veh + veh	N/A	509			14	NSC23766 + veh	N/A	944
1	veh + veh	N/A	870			2	NSC23766 + veh	N/A	1500
7	veh + veh	N/A	637			8	NSC23766 + veh	N/A	817
9	veh + veh	N/A	1500			12	NSC23766 + veh	N/A	1262
10	veh + veh	N/A	1102			13	NSC23766 + veh	N/A	1500
2	veh + veh	N/A	1500			1	NSC23766 + veh	N/A	1270
7	veh + veh	N/A	1500			4	NSC23766 + veh	N/A	1500
9	veh + veh	N/A	1500			5	NSC23766 + veh	N/A	1500
11	veh + veh	N/A	1500			10	NSC23766 + veh	N/A	1500
			1197.42	AVG					1305.33	AVG
			371.415	ST DEV					274.039	ST DEV
			107.218	SEM					79.1081	SEM
Rat ID	Treatment	Rule (Correct Lever)	Trials to Criterion (TTC)			Rat ID	Treatment	Rule (Correct Lever)	Trials to Criterion (TTC)
1	veh + CXCL12	N/A	221			5	NSC23766 + CXCL12	N/A	1183
6	veh + CXCL12	N/A	1500			7	NSC23766 + CXCL12	N/A	1500
8	veh + CXCL12	N/A	859			10	NSC23766 + CXCL12	N/A	1500
16	veh + CXCL12	N/A	1291			13	NSC23766 + CXCL12	N/A	1500
4	veh + CXCL12	N/A	1500			3	NSC23766 + CXCL12	N/A	1132
5	veh + CXCL12	N/A	99			6	NSC23766 + CXCL12	N/A	1500
11	veh + CXCL12	N/A	883			14	NSC23766 + CXCL12	N/A	1500
16	veh + CXCL12	N/A	422			15	NSC23766 + CXCL12	N/A	566
3	veh + CXCL12	N/A	1198			8	NSC23766 + CXCL12	N/A	1500
6	veh + CXCL12	N/A	469			12	NSC23766 + CXCL12	N/A	1500
14	veh + CXCL12	N/A	1500			13	NSC23766 + CXCL12	N/A	1500
16	veh + CXCL12	N/A	598			15	NSC23766 + CXCL12	N/A	1500
			878.333	AVG					1365.08	AVG
			515.762	ST DEV					284.419	ST DEV
			148.888	SEM					82.1048	SEM

## Sheet: Overall Spine Density
	Veh+Veh				Veh+CXCL12				NSC+Veh				NSC+CXCL12
Animal #	Dendrite #	Density(1/µm)		Animal #	Dendrite #	Density(1/µm)		Animal #	Dendrite #	Density(1/µm)		Animal #	Dendrite #	Density(1/µm)
1	1	0.68		1	1	0.55		1	1	0.68		1	1	0.35
1	2	0.78		1	2	0.75		1	2	0.73		1	2	0.64
1	3	0.56		1	3	0.66		1	3	0.56		1	3	0.66
1	4	0.49		1	4	1		1	4	0.31		1	4	0.67
1	5	0.32		1	5	0.87		1	5	0.32		1	5	0.45
1	6	0.54		1	6	0.72		1	6	0.54		1	6	0.45
1	7	0.77		1	7	0.53		1	7	0.96		1	7	0.33
1	8	0.65		1	8	0.91		1	8	0.65		1	8	0.91
		0.59875				0.74875				0.59375				0.5575
2	1	0.56		2	1	0.43		2	1	0.69		2	1	0.43
2	2	0.61		2	2	0.67		2	2	0.81		2	2	0.67
2	3	0.55		2	3	0.89		2	3	0.59		2	3	0.52
2	4	0.54		2	4	0.6		2	4	0.54		2	4	0.68
2	5	0.66		2	5	0.88		2	5	0.35		2	5	0.56
2	6	0.43		2	6	0.8		2	6	0.25		2	6	0.3
2	7	0.64		2	7	0.67		2	7	0.77		2	7	0.67
2	8	0.32		2	8	0.85		2	8	0.32		2	8	0.69
		0.53875				0.72375				0.54				0.565
3	1	0.98		3	1	0.85		3	1	0.98		3	1	0.49
3	2	0.77		3	2	0.91		3	2	0.77		3	2	0.51
3	3	0.48		3	3	0.83		3	3	0.48		3	3	0.54
3	4	0.78		3	4	0.88		3	4	0.78		3	4	0.58
3	5	0.65		3	5	1.13		3	5	0.65		3	5	0.23
3	6	0.68		3	6	0.95		3	6	0.88		3	6	0.54
3	7	0.43		3	7	0.79		3	7	0.43		3	7	0.78
3	8	0.87		3	8	0.77		3	8	0.87		3	8	0.86
		0.705				0.88875				0.73				0.56625
4	1	0.77		4	1	0.87		4	1	0.77		4	1	0.52
4	2	0.88		4	2	0.79		4	2	0.68		4	2	0.36
4	3	0.77		4	3	0.99		4	3	0.77		4	3	0.66
4	4	0.056		4	4	0.77		4	4	0.93		4	4	0.34
4	5	0.55		4	5	0.88		4	5	0.55		4	5	0.71
4	6	0.52		4	6	0.89		4	6	0.62		4	6	0.55
4	7	0.98		4	7	0.9		4	7	0.66		4	7	0.49
4	8	0.46		4	8	0.79		4	8	0.46		4	8	0.59
		0.62325				0.86				0.68				0.5275
5	1	0.63		5	1	0.75		5	1	0.63		5	1	0.58
5	2	0.76		5	2	0.94		5	2	0.76		5	2	0.74
5	3	0.55		5	3	0.77		5	3	0.55		5	3	0.43
5	4	0.69		5	4	0.84		5	4	0.62		5	4	0.65
5	5	0.74		5	5	0.89		5	5	0.74		5	5	0.58
5	6	0.55		5	6	0.82		5	6	0.65		5	6	0.56
5	7	0.79		5	7	0.86		5	7	0.79		5	7	0.41
5	8	0.31		5	8	0.68		5	8	0.31		5	8	0.65
		0.6275				0.81875				0.63125				0.575
6	1	0.88		6	1	0.94		6	1	0.96		6	1	0.41
6	2	0.76		6	2	0.87		6	2	0.76		6	2	0.56
6	3	0.79		6	3	0.89		6	3	0.79		6	3	0.54
6	4	0.69		6	4	0.88		6	4	0.59		6	4	0.66
6	5	0.73		6	5	0.86		6	5	0.74		6	5	0.43
6	6	0.99		6	6	0.79		6	6	0.68		6	6	0.74
6	7	0.98		6	7	0.99		6	7	0.88		6	7	0.68
6	8	0.45		6	8	0.89		6	8	0.35		6	8	0.29
		0.78375				0.88875				0.71875				0.53875
7	1	0.7		7	1	0.61		7	1	0.3		7	1	0.76
7	2	0.65		7	2	0.69		7	2	0.56		7	2	0.56
7	3	0.56		7	3	0.66		7	3	0.45		7	3	0.43
7	4	0.94		7	4	0.68		7	4	0.56		7	4	0.3
7	5	0.83		7	5	0.7		7	5	0.55		7	5	0.56
7	6	0.75		7	6	0.93		7	6	0.67		7	6	0.47
7	7	0.86		7	7	0.88		7	7	0.76		7	7	0.88
7	8	0.96		7	8	0.85		7	8	0.96		7	8	0.85
		0.78125				0.75				0.60125				0.60125
8	1	0.65		8	1	0.86		8	1	0.44		8	1	0.45
8	2	0.55		8	2	0.78		8	2	0.45		8	2	0.65
8	3	0.87		8	3	0.94		8	3	0.67		8	3	0.65
8	4	0.43		8	4	0.79		8	4	0.54		8	4	0.87
8	5	0.68		8	5	0.65		8	5	0.68		8	5	0.32
8	6	0.56		8	6	0.53		8	6	0.46		8	6	0.39
8	7	0.99		8	7	0.7		8	7	0.35		8	7	0.54
8	8	0.77		8	8	0.76		8	8	0.77		8	8	0.28
		0.6875				0.75125				0.545				0.51875
9	1	0.52		9	1	0.61		9	1	0.52		9	1	0.61
9	2	0.76		9	2	0.87		9	2	0.58		9	2	0.87
9	3	0.97		9	3	0.77		9	3	0.67		9	3	0.77
9	4	0.44		9	4	0.86		9	4	0.44		9	4	0.54
9	5	0.43		9	5	0.74		9	5	0.58		9	5	0.64
9	6	0.57		9	6	0.88		9	6	0.37		9	6	0.88
9	7	0.66		9	7	0.93		9	7	0.66		9	7	0.85
9	8	0.75		9	8	0.54		9	8	0.55		9	8	0.54
		0.6375				0.775				0.54625				0.7125
10	1	0.66		10	1	0.66		10	1	0.66		10	1	0.66
10	2	0.77		10	2	0.77		10	2	0.44		10	2	0.77
10	3	0.52		10	3	0.52		10	3	0.52		10	3	0.65
10	4	0.53		10	4	0.53		10	4	0.53		10	4	0.34
10	5	0.789		10	5	0.789		10	5	0.589		10	5	0.76
10	6	0.84		10	6	0.84		10	6	0.77		10	6	0.45
10	7	0.043		10	7	0.58		10	7	0.38		10	7	0.58
10	8	0.89		10	8	0.89		10	8	0.29		10	8	0.89
		0.63025				0.697375				0.522375				0.6375
11	1	0.95		11	1	0.66		11	1	0.76		11	1	0.53
11	2	0.77		11	2	0.79		11	2	0.41		11	2	0.77
11	3	0.59		11	3	0.43		11	3	0.62		11	3	0.43
11	4	0.76		11	4	0.53		11	4	0.53		11	4	0.53
11	5	0.93		11	5	0.789		11	5	0.91		11	5	0.789
11	6	0.84		11	6	0.84		11	6	0.47		11	6	0.84
11	7	0.88		11	7	0.68		11	7	0.25		11	7	0.58
11	8	0.89		11	8	0.59		11	8	0.45		11	8	0.55
		0.82625				0.663625				0.55				0.627375
12	1	0.66		12	1	0.73		12	1	0.19		12	1	0.76
12	2	0.65		12	2	0.77		12	2	0.43		12	2	0.77
12	3	0.52		12	3	0.32		12	3	0.32		12	3	0.72
12	4	0.53		12	4	0.44		12	4	0.23		12	4	0.32
12	5	0.55		12	5	0.54		12	5	0.45		12	5	0.66
12	6	0.94		12	6	0.43		12	6	0.94		12	6	0.74
12	7	0.58		12	7	0.78		12	7	0.63		12	7	0.67
12	8	0.89		12	8	0.93		12	8	0.89		12	8	0.95
		0.665				0.6175				0.51				0.69875

## Sheet: Thin Spine Density
	Veh+Veh				Veh+CXCL12				NSC+Veh				NSC+CXCL12
Animal #	Dendrite #	Density(1/µm)		Animal #	Dendrite #	Density(1/µm)		Animal #	Dendrite #	Density(1/µm)		Animal #	Dendrite #	Density(1/µm)
1	1	0.32		1	1	0.44		1	1	0.32		1	1	0.11
1	2	0.25		1	2	0.32		1	2	0.25		1	2	0.22
1	3	0.28		1	3	0.11		1	3	0.28		1	3	0.01
1	4	0.17		1	4	0.5		1	4	0.17		1	4	0.3
1	5	0.25		1	5	0.43		1	5	0.25		1	5	0.2
1	6	0.45		1	6	0.44		1	6	0.25		1	6	0.21
1	7	0.19		1	7	0.35		1	7	0.19		1	7	0.13
1	8	0.38		1	8	0.87		1	8	0.32		1	8	0.32
		0.28625				0.4325				0.25375				0.1875
2	1	0.22		2	1	0.21		2	1	0.22		2	1	0.21
2	2	0.34		2	2	0.56		2	2	0.14		2	2	0.05
2	3	0.43		2	3	0.69		2	3	0.23		2	3	0.11
2	4	0.33		2	4	0.35		2	4	0.33		2	4	0.3
2	5	0.32		2	5	0.44		2	5	0.32		2	5	0.44
2	6	0.43		2	6	0.23		2	6	0.22		2	6	0.23
2	7	0.15		2	7	0.45		2	7	0.15		2	7	0.09
2	8	0.22		2	8	0.2		2	8	0.22		2	8	0.1
		0.305				0.39125				0.22875				0.19125
3	1	0.43		3	1	0.38		3	1	0.12		3	1	0.38
3	2	0.26		3	2	0.22		3	2	0.26		3	2	0.22
3	3	0.23		3	3	0.18		3	3	0.22		3	3	0.18
3	4	0.31		3	4	0.19		3	4	0.11		3	4	0.19
3	5	0.24		3	5	0.44		3	5	0.24		3	5	0.44
3	6	0.32		3	6	0.76		3	6	0.15		3	6	0.08
3	7	0.23		3	7	0.69		3	7	0.23		3	7	0.054
3	8	0.56		3	8	0.35		3	8	0.42		3	8	0.066
		0.3225				0.40125				0.21875				0.20125
4	1	0.43		4	1	0.54		4	1	0.23		4	1	0.04
4	2	0.26		4	2	0.42		4	2	0.26		4	2	0.12
4	3	0.26		4	3	0.31		4	3	0.26		4	3	0.01
4	4	0.11		4	4	0.32		4	4	0.11		4	4	0.12
4	5	0.21		4	5	0.28		4	5	0.16		4	5	0.28
4	6	0.25		4	6	0.56		4	6	0.25		4	6	0.56
4	7	0.34		4	7	0.28		4	7	0.24		4	7	0.13
4	8	0.45		4	8	0.77		4	8	0.23		4	8	0.08
		0.28875				0.435				0.2175				0.1675
5	1	0.23		5	1	0.12		5	1	0.21		5	1	0.12
5	2	0.32		5	2	0.15		5	2	0.32		5	2	0.15
5	3	0.43		5	3	0.33		5	3	0.09		5	3	0.33
5	4	0.22		5	4	0.26		5	4	0.22		5	4	0.26
5	5	0.24		5	5	0.4		5	5	0.19		5	5	0.2
5	6	0.3		5	6	0.44		5	6	0.2		5	6	0.24
5	7	0.31		5	7	0.47		5	7	0.21		5	7	0.24
5	8	0.31		5	8	0.31		5	8	0.21		5	8	0.31
		0.295				0.31				0.20625				0.23125
6	1	0.32		6	1	0.33		6	1	0.32		6	1	0.33
6	2	0.24		6	2	0.42		6	2	0.32		6	2	0.22
6	3	0.15		6	3	0.2		6	3	0.15		6	3	0.2
6	4	0.2		6	4	0.23		6	4	0.2		6	4	0.32
6	5	0.21		6	5	0.31		6	5	0.21		6	5	0.31
6	6	0.23		6	6	0.32		6	6	0.23		6	6	0.32
6	7	0.23		6	7	0.43		6	7	0.22		6	7	0.05
6	8	0.43		6	8	0.9		6	8	0.12		6	8	0.11
		0.25125				0.3925				0.22125				0.2325
7	1	0.43		7	1	0.33		7	1	0.13		7	1	0.33
7	2	0.32		7	2	0.35		7	2	0.32		7	2	0.143
7	3	0.15		7	3	0.33		7	3	0.15		7	3	0.22
7	4	0.15		7	4	0.42		7	4	0.23		7	4	0.42
7	5	0.33		7	5	0.45		7	5	0.33		7	5	0.12
7	6	0.24		7	6	0.44		7	6	0.34		7	6	0.043
7	7	0.11		7	7	0.23		7	7	0.01		7	7	0.057
7	8	0.61		7	8	0.43		7	8	0.31		7	8	0.099
		0.2925				0.3725				0.2275				0.179
8	1	0.23		8	1	0.23		8	1	0.22		8	1	0.32
8	2	0.27		8	2	0.44		8	2	0.27		8	2	0.1
8	3	0.33		8	3	0.37		8	3	0.21		8	3	0.02
8	4	0.17		8	4	0.32		8	4	0.17		8	4	0.088
8	5	0.16		8	5	0.75		8	5	0.12		8	5	0.16
8	6	0.25		8	6	0.78		8	6	0.25		8	6	0.011
8	7	0.21		8	7	0.6		8	7	0.19		8	7	0.17
8	8	0.19		8	8	0.65		8	8	0.22		8	8	0.076
		0.22625				0.5175				0.20625				0.118125
9	1	0.22		9	1	0.12		9	1	0.25		9	1	0.22
9	2	0.17		9	2	0.42		9	2	0.18		9	2	0.32
9	3	0.11		9	3	0.31		9	3	0.11		9	3	0.11
9	4	0.25		9	4	0.24		9	4	0.25		9	4	0.24
9	5	0.33		9	5	0.18		9	5	0.11		9	5	0.18
9	6	0.35		9	6	0.43		9	6	0.22		9	6	0.05
9	7	0.17		9	7	0.43		9	7	0.08		9	7	0.032
9	8	0.27		9	8	0.6		9	8	0.35		9	8	0.1
		0.23375				0.34125				0.19375				0.1565
10	1	0.14		10	1	0.32		10	1	0.22		10	1	0.09
10	2	0.17		10	2	0.32		10	2	0.17		10	2	0.087
10	3	0.05		10	3	0.44		10	3	0.11		10	3	0.22
10	4	0.16		10	4	0.21		10	4	0.07		10	4	0.21
10	5	0.32		10	5	0.32		10	5	0.11		10	5	0.11
10	6	0.35		10	6	0.34		10	6	0.28		10	6	0.054
10	7	0.32		10	7	0.34		10	7	0.11		10	7	0.15
10	8	0.11		10	8	0.65		10	8	0.27		10	8	0.065
		0.2025				0.3675				0.1675				0.12325
11	1	0.09		11	1	0.22		11	1	0.16		11	1	0.32
11	2	0.17		11	2	0.42		11	2	0.11		11	2	0.23
11	3	0.11		11	3	0.21		11	3	0.11		11	3	0.11
11	4	0.25		11	4	0.24		11	4	0.15		11	4	0.24
11	5	0.12		11	5	0.18		11	5	0.22		11	5	0.18
11	6	0.55		11	6	0.55		11	6	0.06		11	6	0.087
11	7	0.11		11	7	0.22		11	7	0.12		11	7	0.11
11	8	0.23		11	8	0.6		11	8	0.17		11	8	0.05
		0.20375				0.33				0.1375				0.165875
12	1	0.14		12	1	0.32		12	1	0.04		12	1	0.15
12	2	0.09		12	2	0.32		12	2	0.1		12	2	0.28
12	3	0.1		12	3	0.24		12	3	0.09		12	3	0.22
12	4	0.1		12	4	0.21		12	4	0.11		12	4	0.21
12	5	0.12		12	5	0.32		12	5	0.08		12	5	0.09
12	6	0.08		12	6	0.42		12	6	0.15		12	6	0.34
12	7	0.67		12	7	0.34		12	7	0.093		12	7	0.01
12	8	0.27		12	8	0.25		12	8	0.27		12	8	0.054
		0.19625				0.3025				0.116625				0.16925

## Sheet: Stubby Spine Density
	Veh+Veh				Veh+CXCL12				NSC+Veh				NSC+CXCL12
Animal #	Dendrite #	Density(1/µm)		Animal #	Dendrite #	Density(1/µm)		Animal #	Dendrite #	Density(1/µm)		Animal #	Dendrite #	Density(1/µm)
1	1	0.11		1	1	0.01		1	1	0.11		1	1	0.2
1	2	0.21		1	2	0.07		1	2	0.11		1	2	0.34
1	3	0.13		1	3	0.12		1	3	0.09		1	3	0.22
1	4	0.11		1	4	0.08		1	4	0.11		1	4	0.08
1	5	0.08		1	5	0.04		1	5	0.08		1	5	0.04
1	6	0.12		1	6	0.035		1	6	0.12		1	6	0.035
1	7	0.02		1	7	0.025		1	7	0.02		1	7	0.025
1	8	0.1		1	8	0.017		1	8	0.21		1	8	0.017
		0.11				0.049625				0.10625				0.119625
2	1	0.09		2	1	0.13		2	1	0.09		2	1	0.13
2	2	0.19		2	2	0.13		2	2	0.065		2	2	0.13
2	3	0.09		2	3	0.054		2	3	0.09		2	3	0.19
2	4	0.03		2	4	0.16		2	4	0.03		2	4	0.16
2	5	0.09		2	5	0.12		2	5	0.085		2	5	0.12
2	6	0.15		2	6	0.065		2	6	0.03		2	6	0.08
2	7	0.1		2	7	0.12		2	7	0.087		2	7	0.12
2	8	0.09		2	8	0.099		2	8	0.09		2	8	0.16
		0.10375				0.10975				0.070875				0.13625
3	1	0.08		3	1	0.055		3	1	0.04		3	1	0.13
3	2	0.08		3	2	0.044		3	2	0.08		3	2	0.28
3	3	0.15		3	3	0.07		3	3	0.15		3	3	0.12
3	4	0.08		3	4	0.11		3	4	0.08		3	4	0.11
3	5	0.09		3	5	0.08		3	5	0.09		3	5	0.08
3	6	0.07		3	6	0.085		3	6	0.07		3	6	0.11
3	7	0.023		3	7	0.11		3	7	0.023		3	7	0.11
3	8	0.22		3	8	0.14		3	8	0.099		3	8	0.054
		0.099125				0.08675				0.079				0.12425
4	1	0.11		4	1	0.07		4	1	0.11		4	1	0.07
4	2	0.05		4	2	0.05		4	2	0.13		4	2	0.067
4	3	0.04		4	3	0.11		4	3	0.04		4	3	0.11
4	4	0.13		4	4	0.07		4	4	0.13		4	4	0.088
4	5	0.15		4	5	0.07		4	5	0.21		4	5	0.07
4	6	0.08		4	6	0.18		4	6	0.08		4	6	0.18
4	7	0.14		4	7	0.04		4	7	0.23		4	7	0.088
4	8	0.2		4	8	0.12		4	8	0.46		4	8	0.1
		0.1125				0.08875				0.17375				0.096625
5	1	0.098		5	1	0.05		5	1	0.16		5	1	0.05
5	2	0.13		5	2	0.09		5	2	0.055		5	2	0.09
5	3	0.12		5	3	0.07		5	3	0.12		5	3	0.07
5	4	0.08		5	4	0.05		5	4	0.08		5	4	0.05
5	5	0.05		5	5	0.054		5	5	0.05		5	5	0.068
5	6	0.13		5	6	0.056		5	6	0.08		5	6	0.056
5	7	0.045		5	7	0.025		5	7	0.09		5	7	0.035
5	8	0.03		5	8	0.046		5	8	0.03		5	8	0.036
		0.085375				0.055125				0.083125				0.056875
6	1	0.066		6	1	0.05		6	1	0.12		6	1	0.05
6	2	0.06		6	2	0.14		6	2	0.06		6	2	0.14
6	3	0.065		6	3	0.09		6	3	0.14		6	3	0.09
6	4	0.07		6	4	0.067		6	4	0.07		6	4	0.067
6	5	0.067		6	5	0.033		6	5	0.12		6	5	0.033
6	6	0.032		6	6	0.032		6	6	0.14		6	6	0.032
6	7	0.094		6	7	0.078		6	7	0.23		6	7	0.078
6	8	0.13		6	8	0.11		6	8	0.32		6	8	0.55
		0.073				0.075				0.15				0.13
7	1	0.12		7	1	0.078		7	1	0.12		7	1	0.078
7	2	0.14		7	2	0.077		7	2	0.14		7	2	0.077
7	3	0.11		7	3	0.068		7	3	0.14		7	3	0.058
7	4	0.066		7	4	0.055		7	4	0.12		7	4	0.074
7	5	0.05		7	5	0.054		7	5	0.17		7	5	0.044
7	6	0.23		7	6	0.08		7	6	0.11		7	6	0.1
7	7	0.11		7	7	0.063		7	7	0.11		7	7	0.077
7	8	0.05		7	8	0.043		7	8	0.12		7	8	0.043
		0.1095				0.06475				0.12875				0.068875
8	1	0.03		8	1	0.054		8	1	0.03		8	1	0.099
8	2	0.043		8	2	0.031		8	2	0.12		8	2	0.087
8	3	0.1		8	3	0.055		8	3	0.1		8	3	0.032
8	4	0.14		8	4	0.074		8	4	0.023		8	4	0.044
8	5	0.11		8	5	0.065		8	5	0.15		8	5	0.1
8	6	0.125		8	6	0.23		8	6	0.14		8	6	0.12
8	7	0.05		8	7	0.023		8	7	0.05		8	7	0.023
8	8	0.04		8	8	0.088		8	8	0.04		8	8	0.098
		0.07975				0.0775				0.081625				0.075375
9	1	0.06		9	1	0.034		9	1	0.06		9	1	0.077
9	2	0.18		9	2	0.031		9	2	0.13		9	2	0.087
9	3	0.09		9	3	0.021		9	3	0.09		9	3	0.073
9	4	0.1		9	4	0.012		9	4	0.0745		9	4	0.078
9	5	0.07		9	5	0.034		9	5	0.07		9	5	0.23
9	6	0.23		9	6	0.04		9	6	0.054		9	6	0.04
9	7	0.05		9	7	0.023		9	7	0.05		9	7	0.023
9	8	0.09		9	8	0.033		9	8	0.09		9	8	0.1
		0.10875				0.0285				0.0773125				0.0885
10	1	0.06		10	1	0.034		10	1	0.06		10	1	0.05
10	2	0.044		10	2	0.031		10	2	0.15		10	2	0.08
10	3	0.09		10	3	0.021		10	3	0.09		10	3	0.13
10	4	0.0625		10	4	0.023		10	4	0.13		10	4	0.23
10	5	0.07		10	5	0.034		10	5	0.23		10	5	0.19
10	6	0.087		10	6	0.066		10	6	0.12		10	6	0.43
10	7	0.05		10	7	0.023		10	7	0.05		10	7	0.06
10	8	0.09		10	8	0.033		10	8	0.14		10	8	0.1
		0.0691875				0.033125				0.12125				0.15875
11	1	0.06		11	1	0.023		11	1	0.06		11	1	0.12
11	2	0.15		11	2	0.031		11	2	0.1		11	2	0.08
11	3	0.0234		11	3	0.021		11	3	0.09		11	3	0.13
11	4	0.033		11	4	0.145		11	4	0.034		11	4	0.13
11	5	0.0733		11	5	0.015		11	5	0.07		11	5	0.19
11	6	0.0435		11	6	0.023		11	6	0.0999		11	6	0.054
11	7	0.05		11	7	0.023		11	7	0.012		11	7	0.06
11	8	0.0633		11	8	0.33		11	8	0.13		11	8	0.1
		0.0620625				0.076375				0.0744875				0.108
12	1	0.06		12	1	0.021		12	1	0.06		12	1	0.12
12	2	0.1		12	2	0.031		12	2	0.1		12	2	0.08
12	3	0.09		12	3	0.021		12	3	0.09		12	3	0.067
12	4	0.05		12	4	0.01		12	4	0.1		12	4	0.0567
12	5	0.07		12	5	0.023		12	5	0.07		12	5	0.034
12	6	0.099		12	6	0.04		12	6	0.16		12	6	0.16
12	7	0.05		12	7	0.023		12	7	0.05		12	7	0.089
12	8	0.023		12	8	0.033		12	8	0.09		12	8	0.16
		0.06775				0.02525				0.09				0.0958375

## Sheet: Stats
	Test used	Sample size	P value	Statistical information
Figure 8
A	Ordinary one-way ANOVA	48	0.0161	F (3, 44) = 3.826
veh + veh vs. veh + CXCL12	Tukey's multiple comparison's test			CI: -105.2 to 718.7
veh + veh vs. NSC23766 + veh	Tukey's multiple comparison's test			CI: -532.4 to 291.5
veh + veh vs. NSC + CXCL12	Tukey's multiple comparison's test			CI: -579.6 to 244.3
veh + CXCL12 vs. NSC23766 + veh	Tukey's multiple comparison's test			CI: -839.1 to -15.23
veh + CXCL12 vs. NSC + CXCL12	Tukey's multiple comparison's test			CI: -886.4 to -62.48
NSC23766 + veh vs. NSC + CXCL12	Tukey's multiple comparison's test			CI: -459.2 to 364.7
B	Linear regression	40	<0.0001	F = 12.66. DFn = 3, DFd = 32
C	Ordinary one-way ANOVA	48	<0.0001	F (3, 44) = 13.01
Veh+Veh vs. Veh+CXCL12	Tukey's multiple comparison's test		0.0232	CI: -1.802 to -0.09960
Veh+Veh vs. NSC+Veh	Tukey's multiple comparison's test		0.1048	CI: -0.1056 to 1.597
Veh+Veh vs. NSC+CXCL12	Tukey's multiple comparison's test		0.0843	CI: -0.07326 to 1.629
Veh+CXCL12 vs. NSC+Veh	Tukey's multiple comparison's test		<0.0001	CI: 0.8451 to 2.547
Veh+CXCL12 vs. NSC+CXCL12	Tukey's multiple comparison's test		<0.0001	CI: 0.8775 to 2.580
NSC+Veh vs. NSC+CXCL12	Tukey's multiple comparison's test		0.9996	CI: -0.8187 to 0.8835
D (Thin)	Ordinary one-way ANOVA	48	<0.0001	F (3, 44) = 48.16
Veh+Veh vs. Veh+CXCL12	Tukey's multiple comparison's test		<0.0001	CI: -1.745 to -0.7283
Veh+Veh vs. NSC+Veh	Tukey's multiple comparison's test		0.0091	CI: 0.1266 to 1.143
Veh+Veh vs. NSC+CXCL12	Tukey's multiple comparison's test		0.0004	CI: 0.3279 to 1.344
Veh+CXCL12 vs. NSC+Veh	Tukey's multiple comparison's test		<0.0001	CI: 1.363 to 2.380
Veh+CXCL12 vs. NSC+CXCL12	Tukey's multiple comparison's test		<0.0001	CI: 1.564 to 2.581
NSC+Veh vs. NSC+CXCL12	Tukey's multiple comparison's test		0.717	CI: -0.3070 to 0.7095
E (Stubby)	Ordinary one-way ANOVA	48	0.0028	F (3, 44) = 5.475
Veh+Veh vs. Veh+CXCL12	Tukey's multiple comparison's test		0.1355	CI: -0.05071 to 0.5424
Veh+Veh vs. NSC+Veh	Tukey's multiple comparison's test		0.6124	CI: -0.4330 to 0.1601
Veh+Veh vs. NSC+CXCL12	Tukey's multiple comparison's test		0.5332	CI: -0.4472 to 0.1460
Veh+CXCL12 vs. NSC+Veh	Tukey's multiple comparison's test		0.0068	CI: -0.6789 to -0.08574
Veh+CXCL12 vs. NSC+CXCL12	Tukey's multiple comparison's test		0.0047	CI: -0.6930 to -0.09989
NSC+Veh vs. NSC+CXCL12	Tukey's multiple comparison's test		0.9992	CI: -0.3107 to 0.2824
F	Pearson's correlation	23	0.0121	CI: -0.7643 to -0.1292; r= -0.5141
G	Pearson's correlation	23	0.0058	CI: -0.7880 to -0.1873; r= -0.5565
Figure 8 supplement 1
Position Discrimination	Ordinary one-way ANOVA	48	0.2804	F (3, 44) = 1.319
Position Reversal	Ordinary one-way ANOVA	48	0.7042	F (3, 44) = 0.7042
