# Supplementary material for: CXCL12-induced rescue of cortical dendritic spines and cognitive flexibility
Source: eLife. 2020 Jan 23;9:e49717. doi: 10.7554/eLife.49717 (PMC7007222; doi:10.7554/eLife.49717)
Supplement: Figure 9—source data 1. [file elife-49717-fig9-data1.xlsx]

## Sheet: HIV-Tg Behavior
Position Discrimination
Rat ID	Treatment	Rule (Correct Lever)	# Correct	# Incorrect	# Omissions	Trials to Criterion (TTC)			Rat ID	Treatment	Rule (Correct Lever)	# Correct	# Incorrect	# Omissions	Trials to Criterion (TTC)
1	veh + veh	Left	42	15	15	57			3	NSC23766 + veh	Right	24	11	10	35
5	veh + veh	Left	29	21	57	50			6	NSC23766 + veh	Left	36	33	26	69
9	veh + veh	Right	44	29	6	73			11	NSC23766 + veh	Left	16	7	1	23
1	veh + veh	Right	35	16	9	51			3	NSC23766 + veh	Left	29	21	2	50
8	veh + veh	Right	31	19	13	50			4	NSC23766 + veh	Left	42	31	3	72
15	veh + veh	Left	19	6	9	25			10	NSC23766 + veh	Left	31	18	0	49
1	veh + veh	Left	11	7	8	18			7	NSC23766 + veh	Right	29	6	39	35
3	veh + veh	Right	51	35	50	86			9	NSC23766 + veh	Left	14	7	100	21
5	veh + veh	Left	40	14	16	54
			33.5556	18	20.3333	51.5556	AVG					27.625	16.75	22.625	44.25	AVG
			12.6304	9.44722	19.1703	20.9709	ST DEV					9.45572	10.8595	34.2593	19.278	ST DEV
			4.21014	3.14907	6.3901	6.99029	SEM					3.3431	3.83941	12.1125	6.81582	SEM
			% correct	65.0862								% correct	62.2535
Rat ID	Treatment	Rule (Correct Lever)	# Correct	# Incorrect	# Omissions	Trials to Criterion (TTC)			Rat ID	Treatment	Rule (Correct Lever)	# Correct	# Incorrect	# Omissions	Trials to Criterion (TTC)
2	veh + CXCL12	Left	46	18	1	64			4	NSC23766 + CXCL12	Right	38	11	3	49
7	veh + CXCL12	Left	14	9	17	23			8	NSC23766 + CXCL12	Right	27	11	5	38
10	veh + CXCL12	Right	31	8	5	39			12	NSC23766 + CXCL12	Right	17	10	11	27
2	veh + CXCL12	Right	64	24	22	86
5	veh + CXCL12	Left	36	17	6	53			11	NSC23766 + CXCL12	Right	40	12	2	52
9	veh + CXCL12	Left	51	31	1	82
14	veh + CXCL12	Left	10	2	1	12			13	NSC23766 + CXCL12	Left	43	16	36	59
									6	NSC23766 + CXCL12	Left	14	10	100	24
2	veh + CXCL12	Right	13	4	52	17			8	NSC23766 + CXCL12	Left	10	0	9	10
4	veh + CXCL12	Right	40	29	22	69			10	NSC23766 + CXCL12	Right	50	24	1	74
			33.8889	15.7778	14.1111	49.4444	AVG					29.875	11.75	20.875	41.625	AVG
			18.7046	10.6979	16.7066	27.9871	ST DEV					14.9613	6.69221	33.9135	20.8733	ST DEV
			6.23486	3.56596	5.56887	9.32903	SEM					5.2896	2.36605	11.9902	7.37984	SEM
			% correct	68.2327								% correct	71.7718
Reversal
Rat ID	Treatment	Rule (Correct Lever)	# Correct	# Incorrect	# Omissions	Trials to Criterion (TTC)			Rat ID	Treatment	Rule (Correct Lever)	# Correct	# Incorrect	# Omissions	Trials to Criterion (TTC)
1	veh + veh	Right	33	74	3	107			3	NSC23766 + veh	Left	35	44	24	79
5	veh + veh	Right	26	51	68	77			6	NSC23766 + veh	Right	27	20	8	47
9	veh + veh	Left	32	158	0	190			11	NSC23766 + veh	Right	31	34	16	65
1	veh + veh	Left	22	27	9	49			3	NSC23766 + veh	Right	53	59	11	112
8	veh + veh	Left	52	30	0	82			4	NSC23766 + veh	Right	45	53	0	98
15	veh + veh	Right	53	33	33	86			10	NSC23766 + veh	Right	18	45	0	63
1	veh + veh	Right	29	20	120	49			7	NSC23766 + veh	Left	23	26	3	49
3	veh + veh	Left	18	12	1	30			9	NSC23766 + veh	Right	33	37	102	70
5	veh + veh	Right	43	83	33	126
			34.2222	54.2222	29.6667	88.4444	AVG					33.125	39.75	20.5	72.875	AVG
			12.5477	45.7323	40.884	48.4436	ST DEV					11.4198	13.1557	33.9495	22.6995	ST DEV
			4.18256	15.2441	13.628	16.1479	SEM					4.03749	4.65123	12.003	8.02549	SEM
			% correct	38.6935								% correct	45.4545
Rat ID	Treatment	Rule (Correct Lever)	# Correct	# Incorrect	# Omissions	Trials to Criterion (TTC)			Rat ID	Treatment	Rule (Correct Lever)	# Correct	# Incorrect	# Omissions	Trials to Criterion (TTC)
2	veh + CXCL12	Right	51	89	1	140			4	NSC23766 + CXCL12	Left	21	47	37	68
7	veh + CXCL12	Right	22	37	38	59			8	NSC23766 + CXCL12	Left	38	67	8	105
10	veh + CXCL12	Left	38	35	1	73			12	NSC23766 + CXCL12	Left	21	76	14	97
2	veh + CXCL12	Left	35	33	122	68
5	veh + CXCL12	Right	35	54	9	89			11	NSC23766 + CXCL12	Left	38	73	2	111
9	veh + CXCL12	Right	45	105	4	150
14	veh + CXCL12	Right	32	50	24	82			13	NSC23766 + CXCL12	Right	17	28	0	45
									6	NSC23766 + CXCL12	Right	26	18	2	44
2	veh + CXCL12	Left	21	29	100	50			8	NSC23766 + CXCL12	Right	14	12	56	26
4	veh + CXCL12	Left	36	63	11	99			10	NSC23766 + CXCL12	Left	33	66	3	99
			35	55	34.4444	90	AVG					26	48.375	15.25	74.375	AVG
			9.61769	26.5283	45.3407	34.6049	ST DEV					9.35032	25.884	20.4293	32.8718	ST DEV
			3.2059	8.84276	15.1136	11.535	SEM					3.30584	9.15138	7.22286	11.6219	SEM
			% correct	38.8889								% correct	34.958
Shift to cue
Rat ID	Treatment	Rule (Correct Lever)	# Correct	# Incorrect	# Omissions	Trials to Criterion (TTC)			Rat ID	Treatment	Rule (Correct Lever)	# Correct	# Incorrect	# Omissions	Trials to Criterion (TTC)
1	veh + veh	N/A	583	570		1153			3	NSC23766 + veh	N/A				1500
5	veh + veh	N/A				1500			6	NSC23766 + veh	N/A				1500
9	veh + veh	N/A				1500			11	NSC23766 + veh	N/A				1500
1	veh + veh	N/A				1500			3	NSC23766 + veh	N/A	187	137		324
8	veh + veh	N/A				1500			4	NSC23766 + veh	N/A				1500
15	veh + veh	N/A	431	416		847			10	NSC23766 + veh	N/A	446	383		829
1	veh + veh	N/A				1500			7	NSC23766 + veh	N/A				1500
3	veh + veh	N/A	669	570		1239			9	NSC23766 + veh	N/A				1500
5	veh + veh	N/A				1500
			561	518.667	#DIV/0!	1359.89	AVG					316.5	260	#DIV/0!	1269.12	AVG
			120.516	88.9119	#DIV/0!	234.056	ST DEV					183.141	173.948	#DIV/0!	448.297	ST DEV
			69.5797	51.3333	#DIV/0!	78.0188	SEM					129.5	123	#DIV/0!	158.497	SEM
			% correct	51.9605								% correct	54.9003
Rat ID	Treatment	Rule (Correct Lever)	# Correct	# Incorrect	# Omissions	Trials to Criterion (TTC)			Rat ID	Treatment	Rule (Correct Lever)	# Correct	# Incorrect	# Omissions	Trials to Criterion (TTC)
2	veh + CXCL12	N/A				1500			4	NSC23766 + CXCL12	N/A				1500
7	veh + CXCL12	N/A	711	599		1310			8	NSC23766 + CXCL12	N/A				1500
10	veh + CXCL12	N/A	263	229		492			12	NSC23766 + CXCL12	N/A				1500
2	veh + CXCL12	N/A	327	292		619
5	veh + CXCL12	N/A	546	554		1100			11	NSC23766 + CXCL12	N/A	430	364		794
9	veh + CXCL12	N/A	361	315		676
14	veh + CXCL12	N/A				1500			13	NSC23766 + CXCL12	N/A				1500
									6	NSC23766 + CXCL12	N/A				1500
2	veh + CXCL12	N/A				1500			8	NSC23766 + CXCL12	N/A				1500
4	veh + CXCL12	N/A				1500			10	NSC23766 + CXCL12	N/A	269	211		480
			441.6	397.8	#DIV/0!	1133	AVG					349.5	287.5	#DIV/0!	1284.25	AVG
			183.714	166.9	#DIV/0!	426.483	ST DEV					113.844	108.187	#DIV/0!	408.211	ST DEV
			82.1594	74.6401	#DIV/0!	142.161	SEM					80.5	76.5	#DIV/0!	144.324	SEM
			% correct	52.609								% correct	54.8666

## Sheet: Overall Spine Density 
	Veh+Veh				Veh+CXCL12				NSC+Veh				NSC+CXCL12
Animal #	Dendrite #	Density(1/µm)		Animal #	Dendrite #	Density(1/µm)		Animal #	Dendrite #	Density(1/µm)		Animal #	Dendrite #	Density(1/µm)
1	1	0.68		1	1	0.55		1	1	0.55		1	1	0.59
1	2	0.78		1	2	0.75		1	2	0.43		1	2	0.55
1	3	0.56		1	3	0.66		1	3	0.56		1	3	0.66
1	4	0.49		1	4	1		1	4	0.49		1	4	0.66
1	5	0.25		1	5	0.89		1	5	0.32		1	5	0.67
1	6	0.54		1	6	0.72		1	6	0.54		1	6	0.34
1	7	0.54		1	7	0.63		1	7	0.45		1	7	0.53
1	8	0.65		1	8	0.91		1	8	0.523		1	8	0.51
		0.56125				0.76375				0.482875				0.56375
2	1	0.64		2	1	0.53		2	1	0.56		2	1	0.43
2	2	0.43		2	2	0.67		2	2	0.61		2	2	0.67
2	3	0.55		2	3	0.89		2	3	0.55		2	3	0.67
2	4	0.54		2	4	0.75		2	4	0.54		2	4	0.6
2	5	0.66		2	5	0.88		2	5	0.66		2	5	0.68
2	6	0.43		2	6	0.8		2	6	0.43		2	6	0.432
2	7	0.64		2	7	0.77		2	7	0.64		2	7	0.74
2	8	0.32		2	8	0.99		2	8	0.32		2	8	0.65
		0.52625				0.785				0.53875				0.609
3	1	0.98		3	1	0.45		3	1	0.096		3	1	0.549
3	2	0.77		3	2	0.71		3	2	0.77		3	2	0.41
3	3	0.55		3	3	0.83		3	3	0.48		3	3	0.75
3	4	0.54		3	4	0.88		3	4	0.69		3	4	0.587
3	5	0.56		3	5	0.99		3	5	0.85		3	5	0.54
3	6	0.68		3	6	0.65		3	6	0.78		3	6	0.24
3	7	0.43		3	7	0.34		3	7	0.43		3	7	0.34
3	8	0.45		3	8	0.77		3	8	0.54		3	8	0.327
		0.62				0.7025				0.5795				0.467875
4	1	0.77		4	1	0.87		4	1	0.34		4	1	0.145
4	2	0.54		4	2	0.79		4	2	0.54		4	2	0.455
4	3	0.34		4	3	0.99		4	3	0.47		4	3	0.45
4	4	0.65		4	4	0.77		4	4	0.567		4	4	0.254
4	5	0.23		4	5	0.88		4	5	0.23		4	5	0.476
4	6	0.57		4	6	0.89		4	6	0.45		4	6	0.345
4	7	0.33		4	7	0.56		4	7	0.31		4	7	0.4
4	8	0.46		4	8	0.79		4	8	0.46		4	8	0.56
		0.48625				0.8175				0.420875				0.385625
5	1	0.63		5	1	0.75		5	1	0.63		5	1	0.451
5	2	0.76		5	2	0.67		5	2	0.76		5	2	0.444
5	3	0.55		5	3	0.77		5	3	0.55		5	3	0.432
5	4	0.69		5	4	0.65		5	4	0.69		5	4	0.145
5	5	0.74		5	5	0.89		5	5	0.56		5	5	0.55
5	6	0.55		5	6	0.97		5	6	0.55		5	6	0.43
5	7	0.79		5	7	0.86		5	7	0.59		5	7	0.58
5	8	0.54		5	8	0.68		5	8	0.41		5	8	0.68
		0.65625				0.78				0.5925				0.464
6	1	0.234		6	1	0.91		6	1	0.14		6	1	0.57
6	2	0.67		6	2	0.55		6	2	0.37		6	2	0.84
6	3	0.44		6	3	0.56		6	3	0.54		6	3	0.69
6	4	0.356		6	4	0.75		6	4	0.69		6	4	0.54
6	5	0.666		6	5	0.86		6	5	0.24		6	5	0.59
6	6	0.46		6	6	0.45		6	6	0.68		6	6	0.75
6	7	0.564		6	7	0.67		6	7	0.21		6	7	0.81
6	8	0.45		6	8	0.653		6	8	0.25		6	8	0.46
		0.48				0.675375				0.39				0.65625
7	1	0.59		7	1	0.61		7	1	0.78		7	1	0.62
7	2	0.76		7	2	0.89		7	2	0.79		7	2	0.25
7	3	0.51		7	3	0.86		7	3	0.59		7	3	0.83
7	4	0.67		7	4	0.78		7	4	0.94		7	4	0.77
7	5	0.65		7	5	0.7		7	5	0.76		7	5	0.54
7	6	0.74		7	6	0.84		7	6	0.63		7	6	0.66
7	7	0.61		7	7	0.88		7	7	0.56		7	7	0.44
7	8	0.67		7	8	0.85		7	8	0.7		7	8	0.68
		0.65				0.80125				0.71875				0.59875
8	1	0.94		8	1	0.84		8	1	0.42		8	1	0.54
8	2	0.73		8	2	0.72		8	2	0.57		8	2	0.66
8	3	0.59		8	3	0.53		8	3	0.7		8	3	0.44
8	4	0.58		8	4	0.9		8	4	0.7		8	4	0.68
8	5	0.67		8	5	0.73		8	5	0.61		8	5	0.65
8	6	0.74		8	6	0.69		8	6	0.52		8	6	0.74
8	7	0.67		8	7	0.96		8	7	0.79		8	7	0.61
8	8	0.65		8	8	0.77		8	8	0.56		8	8	0.67
		0.69625				0.7675				0.60875				0.62375
9	1	0.7		9	1	0.83
9	2	0.58		9	2	0.75
9	3	0.6		9	3	0.85
9	4	0.74		9	4	0.9
9	5	0.59		9	5	0.79
9	6	0.8		9	6	0.72
9	7	0.7		9	7	0.9
9	8	0.76		9	8	0.47
		0.68375				0.77625

## Sheet: Thin Spine Density
	Veh+Veh				Veh+CXCL12				NSC+Veh				NSC+CXCL12
Animal #	Dendrite #	Density(1/µm)		Animal #	Dendrite #	Density(1/µm)		Animal #	Dendrite #	Density(1/µm)		Animal #	Dendrite #	Density(1/µm)
1	1	0.32		1	1	0.44		1	1	0.32		1	1	0.23
1	2	0.25		1	2	0.32		1	2	0.25		1	2	0.32
1	3	0.28		1	3	0.21		1	3	0.28		1	3	0.11
1	4	0.17		1	4	0.5		1	4	0.17		1	4	0.25
1	5	0.25		1	5	0.33		1	5	0.25		1	5	0.13
1	6	0.45		1	6	0.44		1	6	0.45		1	6	0.44
1	7	0.25		1	7	0.45		1	7	0.23		1	7	0.35
1	8	0.38		1	8	0.87		1	8	0.32		1	8	0.37
		0.29375				0.445	Average			0.28375				0.275	Average
2	1	0.32		2	1	0.21		2	1	0.22		2	1	0.11
2	2	0.29		2	2	0.56		2	2	0.24		2	2	0.23
2	3	0.43		2	3	0.69		2	3	0.32		2	3	0.43
2	4	0.33		2	4	0.3		2	4	0.33		2	4	0.3
2	5	0.32		2	5	0.44		2	5	0.32		2	5	0.25
2	6	0.22		2	6	0.23		2	6	0.22		2	6	0.23
2	7	0.25		2	7	0.45		2	7	0.15		2	7	0.25
2	8	0.22		2	8	0.24		2	8	0.22		2	8	0.1
		0.2975				0.39				0.2525				0.2375
3	1	0.33		3	1	0.38		3	1	0.23		3	1	0.38
3	2	0.26		3	2	0.29		3	2	0.26		3	2	0.29
3	3	0.33		3	3	0.27		3	3	0.33		3	3	0.34
3	4	0.21		3	4	0.33		3	4	0.11		3	4	0.29
3	5	0.24		3	5	0.44		3	5	0.24		3	5	0.44
3	6	0.32		3	6	0.88		3	6	0.32		3	6	0.43
3	7	0.45		3	7	0.89		3	7	0.23		3	7	0.23
3	8	0.72		3	8	0.85		3	8	0.72		3	8	0.17
		0.3575				0.54125				0.305				0.32125
4	1	0.23		4	1	0.44		4	1	0.23		4	1	0.268
4	2	0.26		4	2	0.32		4	2	0.26		4	2	0.22
4	3	0.26		4	3	0.21		4	3	0.26		4	3	0.21
4	4	0.11		4	4	0.32		4	4	0.11		4	4	0.12
4	5	0.16		4	5	0.28		4	5	0.16		4	5	0.46
4	6	0.25		4	6	0.56		4	6	0.25		4	6	0.16
4	7	0.35		4	7	0.13		4	7	0.34		4	7	0.13
4	8	0.45		4	8	0.97		4	8	0.24		4	8	0.23
		0.25875				0.40375				0.23125				0.22475
5	1	0.44		5	1	0.31		5	1	0.54		5	1	0.12
5	2	0.32		5	2	0.29		5	2	0.32		5	2	0.15
5	3	0.23		5	3	0.33		5	3	0.43		5	3	0.33
5	4	0.22		5	4	0.26		5	4	0.45		5	4	0.26
5	5	0.19		5	5	0.32		5	5	0.23		5	5	0.2
5	6	0.2		5	6	0.24		5	6	0.2		5	6	0.24
5	7	0.21		5	7	0.24		5	7	0.51		5	7	0.24
5	8	0.21		5	8	0.31		5	8	0.31		5	8	0.21
		0.2525				0.2875				0.37375				0.21875
6	1	0.24		6	1	0.33		6	1	0.44		6	1	0.27
6	2	0.145		6	2	0.47		6	2	0.32		6	2	0.44
6	3	0.15		6	3	0.56		6	3	0.15		6	3	0.23
6	4	0.2		6	4	0.43		6	4	0.2		6	4	0.13
6	5	0.21		6	5	0.31		6	5	0.21		6	5	0.19
6	6	0.23		6	6	0.45		6	6	0.23		6	6	0.38
6	7	0.156		6	7	0.66		6	7	0.56		6	7	0.51
6	8	0.32		6	8	0.9		6	8	0.77		6	8	0.14
		0.206375				0.51375				0.36				0.28625
7	1	0.22		7	1	0.33		7	1	0.41		7	1	0.36
7	2	0.38		7	2	0.41		7	2	0.52		7	2	0.07
7	3	0.24		7	3	0.43		7	3	0.45		7	3	0.47
7	4	0.31		7	4	0.42		7	4	0.68		7	4	0.37
7	5	0.31		7	5	0.45		7	5	0.48		7	5	0.44
7	6	0.37		7	6	0.44		7	6	0.45		7	6	0.33
7	7	0.33		7	7	0.68		7	7	0.34		7	7	0.25
7	8	0.3		7	8	0.85		7	8	0.45		7	8	0.37
		0.3075				0.50125				0.4725				0.3325
8	1	0.68		8	1	0.63		8	1	0.19		8	1	0.31
8	2	0.46		8	2	0.61		8	2	0.19		8	2	0.34
8	3	0.32		8	3	0.45		8	3	0.35		8	3	0.19
8	4	0.75		8	4	0.62		8	4	0.42		8	4	0.34
8	5	0.49		8	5	0.53		8	5	0.42		8	5	0.31
8	6	0.35		8	6	0.52		8	6	0.2		8	6	0.37
8	7	0.35		8	7	0.59		8	7	0.59		8	7	0.33
8	8	0.49		8	8	0.63		8	8	0.26		8	8	0.3
		0.48625				0.5725				0.3275				0.31125
9	1	0.31		9	1	0.55
9	2	0.29		9	2	0.43
9	3	0.26		9	3	0.53
9	4	0.43		9	4	0.62
9	5	0.39		9	5	0.49
9	6	0.42		9	6	0.58
9	7	0.37		9	7	0.53
9	8	0.5		9	8	0.25
		0.37125				0.4975

## Sheet: Stubby Spine Density
	Veh+Veh				Veh+CXCL12				NSC+Veh				NSC+CXCL12
Animal #	Dendrite #	Density(1/µm)		Animal #	Dendrite #	Density(1/µm)		Animal #	Dendrite #	Density(1/µm)		Animal #	Dendrite #	Density(1/µm)
1	1	0.11		1	1	0.01		1	1	0.11		1	1	0.01
1	2	0.21		1	2	0.13		1	2	0.21		1	2	0.07
1	3	0.13		1	3	0.12		1	3	0.13		1	3	0.12
1	4	0.11		1	4	0.08		1	4	0.11		1	4	0.08
1	5	0.14		1	5	0.23		1	5	0.08		1	5	0.134
1	6	0.12		1	6	0.094		1	6	0.11		1	6	0.2346
1	7	0.16		1	7	0.025		1	7	0.02		1	7	0.199
1	8	0.1		1	8	0.07		1	8	0.1		1	8	0.017
		0.135				0.094875				0.10875				0.108075
2	1	0.25		2	1	0.13		2	1	0.09		2	1	0.13
2	2	0.14		2	2	0.13		2	2	0.14		2	2	0.235
2	3	0.22		2	3	0.143		2	3	0.156		2	3	0.19
2	4	0.03		2	4	0.16		2	4	0.065		2	4	0.16
2	5	0.09		2	5	0.12		2	5	0.09		2	5	0.12
2	6	0.11		2	6	0.08		2	6	0.23		2	6	0.08
2	7	0.1		2	7	0.12		2	7	0.1		2	7	0.12
2	8	0.15		2	8	0.109		2	8	0.09		2	8	0.13
		0.13625				0.124				0.120125				0.145625
3	1	0.04		3	1	0.13		3	1	0.04		3	1	0.13
3	2	0.28		3	2	0.145		3	2	0.173		3	2	0.24
3	3	0.15		3	3	0.07		3	3	0.15		3	3	0.07
3	4	0.34		3	4	0.11		3	4	0.08		3	4	0.11
3	5	0.12		3	5	0.143		3	5	0.324		3	5	0.08
3	6	0.07		3	6	0.17		3	6	0.22		3	6	0.22
3	7	0.11		3	7	0.065		3	7	0.333		3	7	0.11
3	8	0.12		3	8	0.095		3	8	0.12		3	8	0.14
		0.15375				0.116				0.18				0.1375
4	1	0.11		4	1	0.07		4	1	0.11		4	1	0.07
4	2	0.13		4	2	0.05		4	2	0.13		4	2	0.089
4	3	0.04		4	3	0.11		4	3	0.04		4	3	0.11
4	4	0.13		4	4	0.07		4	4	0.13		4	4	0.07
4	5	0.21		4	5	0.07		4	5	0.21		4	5	0.222
4	6	0.095		4	6	0.18		4	6	0.08		4	6	0.18
4	7	0.14		4	7	0.04		4	7	0.11		4	7	0.135
4	8	0.46		4	8	0.12		4	8	0.23		4	8	0.12
		0.164375				0.08875				0.13				0.1245
5	1	0.16		5	1	0.0888		5	1	0.16		5	1	0.111
5	2	0.13		5	2	0.09		5	2	0.13		5	2	0.332
5	3	0.12		5	3	0.07		5	3	0.12		5	3	0.07
5	4	0.32		5	4	0.087		5	4	0.08		5	4	0.05
5	5	0.14		5	5	0.13		5	5	0.05		5	5	0.087
5	6	0.13		5	6	0.235		5	6	0.13		5	6	0.225
5	7	0.14		5	7	0.0897		5	7	0.19		5	7	0.025
5	8	0.03		5	8	0.036		5	8	0.23		5	8	0.036
		0.14625				0.103313				0.13625				0.117
6	1	0.12		6	1	0.05		6	1	0.12		6	1	0.09
6	2	0.06		6	2	0.14		6	2	0.2		6	2	0.17
6	3	0.14		6	3	0.09		6	3	0.14		6	3	0.25
6	4	0.07		6	4	0.067		6	4	0.199		6	4	0.19
6	5	0.17		6	5	0.033		6	5	0.12		6	5	0.16
6	6	0.14		6	6	0.032		6	6	0.14		6	6	0.22
6	7	0.19		6	7	0.078		6	7	0.23		6	7	0.08
6	8	0.35		6	8	0.55		6	8	0.45		6	8	0.13
		0.155				0.13				0.199875				0.16125
7	1	0.08		7	1	0.078		7	1	0.14		7	1	0.11
7	2	0.26		7	2	0.12		7	2	0.15		7	2	0.12
7	3	0.12		7	3	0.09999		7	3	0		7	3	0.19
7	4	0.09		7	4	0.23		7	4	0.05		7	4	0.2
7	5	0.17		7	5	0.067		7	5	0.15		7	5	0.14
7	6	0.19		7	6	0.08		7	6	0.02		7	6	0.14
7	7	0.16		7	7	0.063		7	7	0.1		7	7	0.2
7	8	0.2		7	8	0.0777		7	8	0.11		7	8	0.11
		0.15875				0.101961				0.09				0.15125
8	1	0.06		8	1	0.06		8	1	0.17		8	1	0.1
8	2	0.12		8	2	0.03		8	2	0.19		8	2	0.16
8	3	0.07		8	3	0		8	3	0.17		8	3	0.15
8	4	0		8	4	0.03		8	4	0.13		8	4	0.12
8	5	0.05		8	5	0.05		8	5	0.04		8	5	0.17
8	6	0.16		8	6	0.06		8	6	0.16		8	6	0.19
8	7	0.1		8	7	0.08		8	7	0.1		8	7	0.16
8	8	0.04		8	8	0		8	8	0.14		8	8	0.2
		0.075				0.03875				0.1375				0.15625
9	1	0.04		9	1	0.09
9	2	0.12		9	2	0.06
9	3	0.11		9	3	0.08
9	4	0.04		9	4	0.03
9	5	0.11		9	5	0.07
9	6	0.15		9	6	0.03
9	7	0.15		9	7	0.11
9	8	0.14		9	8	0.08
		0.1075				0.06875

## Sheet: Stats
	Test used	Sample size	P value	Statistical information
Figure 9
B	Linear regression	34	0.0006	F = 7.503. DFn = 3, DFd = 32
C	Ordinary one-way ANOVA	34	<0.0001	F (3, 30) = 12.28
Veh+Veh vs. Veh+CXCL12	Tukey's multiple comparison's test			CI: -2.807 to -0.5774
Veh+Veh vs. NSC+Veh	Tukey's multiple comparison's test			CI: -0.6323 to 1.666
Veh+Veh vs. NSC+CXCL12	Tukey's multiple comparison's test			CI: -0.6999 to 1.598
Veh+CXCL12 vs. NSC+Veh	Tukey's multiple comparison's test			CI: 1.060 to 3.358
Veh+CXCL12 vs. NSC+CXCL12	Tukey's multiple comparison's test			CI: 0.9922 to 3.290
NSC+Veh vs. NSC+CXCL12	Tukey's multiple comparison's test			CI: -1.250 to 1.115
D (Thin)	Ordinary one-way ANOVA	34	0.0001	F (3, 30) = 9.743
Veh+Veh vs. Veh+CXCL12	Tukey's multiple comparison's test			CI: -2.477 to -0.5063
Veh+Veh vs. NSC+Veh	Tukey's multiple comparison's test			CI: -1.132 to 0.9003
Veh+Veh vs. NSC+CXCL12	Tukey's multiple comparison's test			CI: -0.6581 to 1.374
Veh+CXCL12 vs. NSC+Veh	Tukey's multiple comparison's test			CI: 0.3604 to 2.392
Veh+CXCL12 vs. NSC+CXCL12	Tukey's multiple comparison's test			CI: 0.8338 to 2.866
NSC+Veh vs. NSC+CXCL12	Tukey's multiple comparison's test			CI: -0.5719 to 1.519
E (Stubby)	Ordinary one-way ANOVA	34	0.0137	F (3, 30) = 4.189
Veh+Veh vs. Veh+CXCL12	Tukey's multiple comparison's test			CI: 0.02886 to 0.7736
Veh+Veh vs. NSC+Veh	Tukey's multiple comparison's test			CI: -0.3911 to 0.3766
Veh+Veh vs. NSC+CXCL12	Tukey's multiple comparison's test			CI: -0.3730 to 0.3947
Veh+CXCL12 vs. NSC+Veh	Tukey's multiple comparison's test			CI: -0.7923 to -0.02463
Veh+CXCL12 vs. NSC+CXCL12	Tukey's multiple comparison's test			CI: -0.7743 to -0.006582
NSC+Veh vs. NSC+CXCL12	Tukey's multiple comparison's test			CI: -0.3769 to 0.4130
F	Pearson's correlation	12	0.4808	CI: -0.7079 to 0.4001; r= -0.2256
G	Pearson's correlation	12	0.0029	CI: -0.9347 to -0.3695; r= -0.7783
Figure 9 supplement 1
Position Discrimination	Ordinary one-way ANOVA	34	0.1084	F (3, 20) = 0.1084
Position Reversal	Ordinary one-way ANOVA	34	0.4264	F (3, 20) = 0.4264
